# Supplementary material for: Design, synthesis, in vitro and in vivo evaluation of tacrine–cinnamic acid hybrids as multi-target acetyl- and butyrylcholinesterase inhibitors against Alzheimer's disease
Source: Royal Society of Chemistry journal article supplement (doi:10.1039/c7ra04385f), 2017-01-01
Supplement: c7ra04385f1.pdf [file c7ra04385f1.pdf]

**Design, Synthesis, In Vitro and In Vivo Evaluation of Tacrine-Cinnamic Acid Hybrids as Multi-Target Acetyl- and Butyrylcholinesterase Inhibitors against Alzheimer's Disease**

Yao Chen <sup>a,b,c</sup>, Hongzhi Lin <sup>e</sup>, Jie Zhu <sup>e</sup>, Kai Gu <sup>e</sup>, Qi Li <sup>e</sup>, Siyu He <sup>e</sup>, Xin Lu <sup>e</sup>, Renxiang Tan <sup>b</sup>, Yuqiong Pei <sup>a</sup>, Liang Wu <sup>b</sup>, Yaoyao Bian <sup>d,\*</sup>, Haopeng Sun <sup>e,\*</sup>

*<sup>a</sup>School of Pharmacy, Nanjing University of Chinese Medicine, Nanjing, 210023, China;*

*<sup>b</sup>State Key Laboratory Cultivation Base for TCM Quality and Efficacy, Nanjing University of Chinese Medicine, Nanjing, 210023, China;*

*<sup>c</sup>Jiangsu Key Laboratory for Functional Substance of Chinese Medicine, Nanjing University of Chinese Medicine, Nanjing, 210023, China;*

*<sup>d</sup>School of Nursing, Nanjing University of Chinese Medicine, Nanjing, 210023, China;*

*<sup>e</sup>Department of Medicinal Chemistry, China Pharmaceutical University, Nanjing, 210009, China;*

### 8 <sup>1</sup>H NMR spectrum

SHP160603-6  
SHP160603-6 DMSO 1HNMR AV300

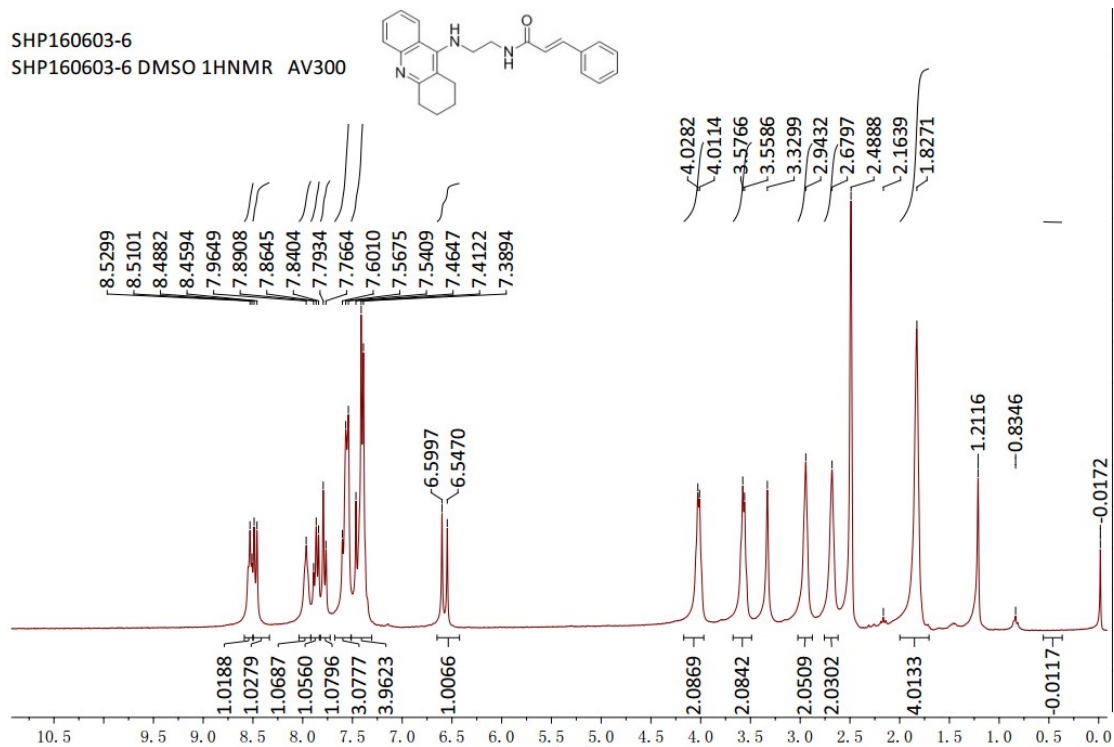

### 8 <sup>13</sup>C NMR spectrum

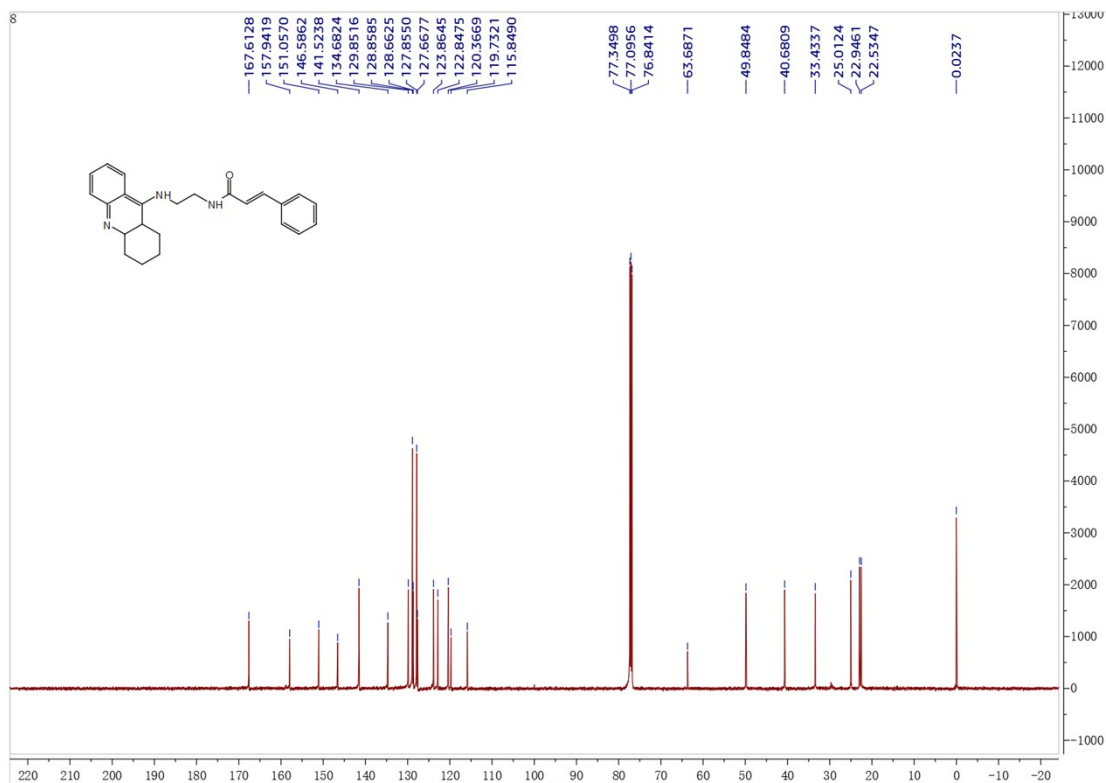

# 9 <sup>1</sup>H NMR spectrum

SHP160617-115  
SHP160617-15 DMSO 1HNMR AV300

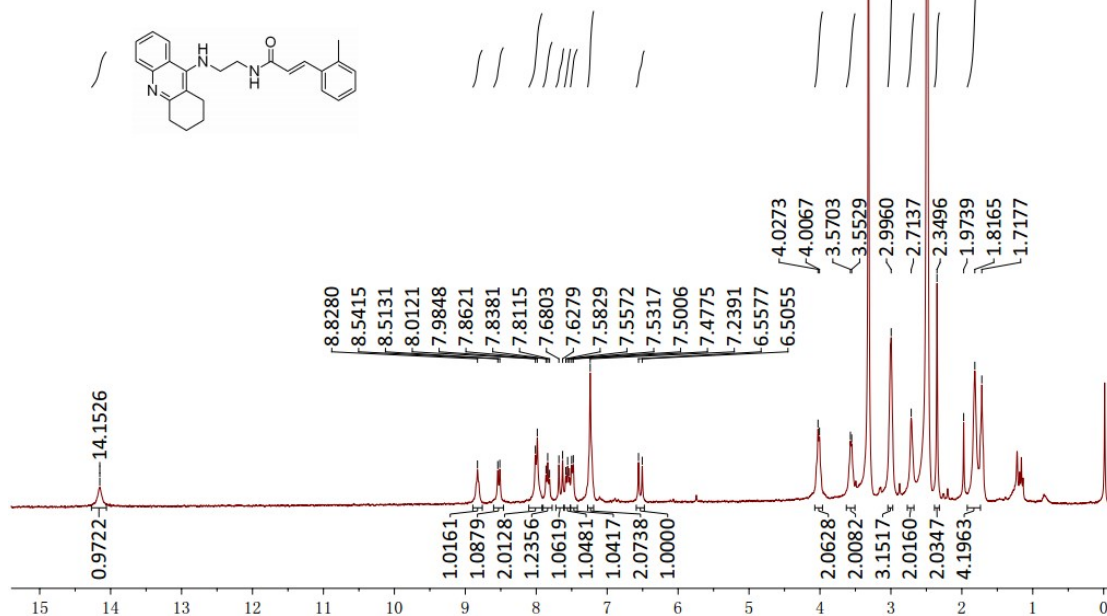

# 9 <sup>13</sup>C NMR spectrum

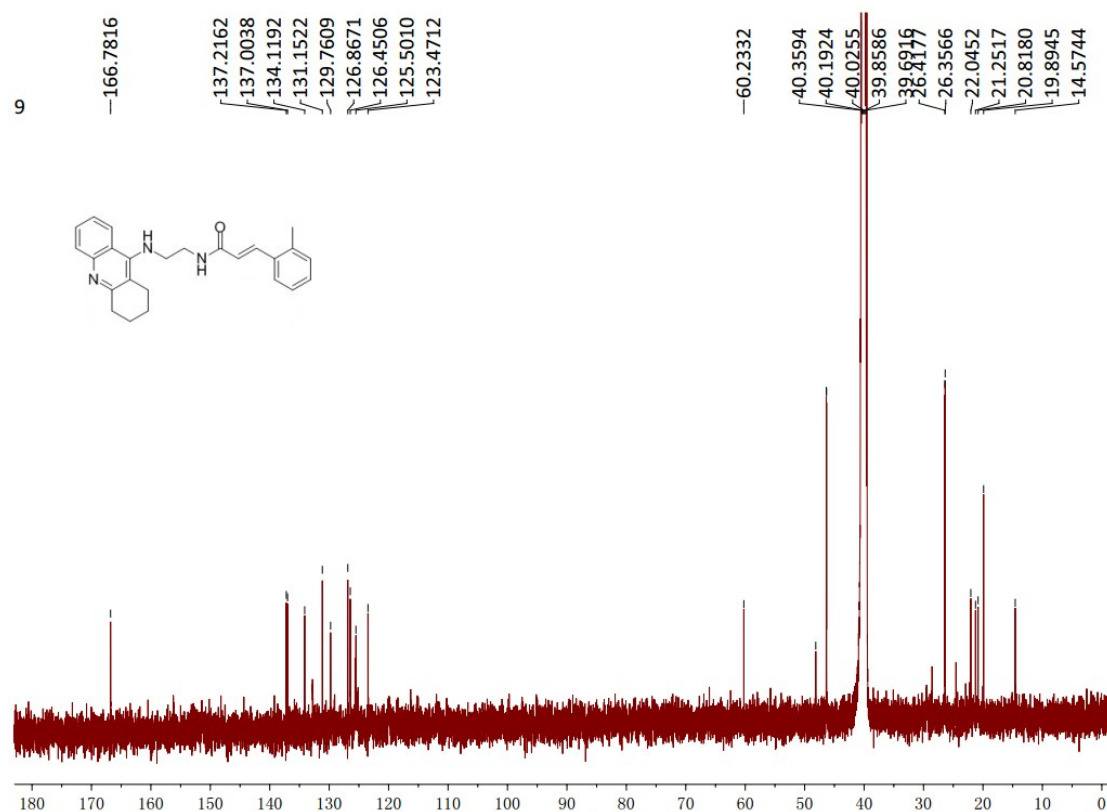

# 10 <sup>1</sup>H NMR spectrum

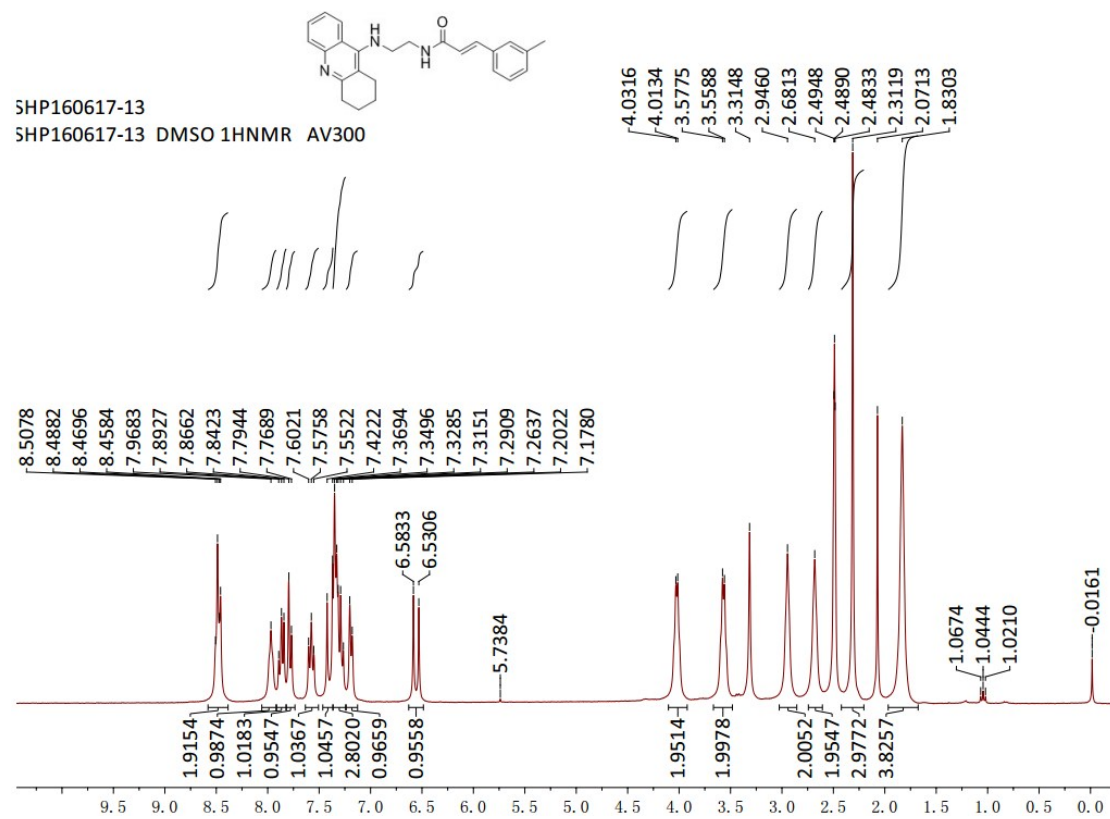

# 10 <sup>13</sup>C NMR spectrum

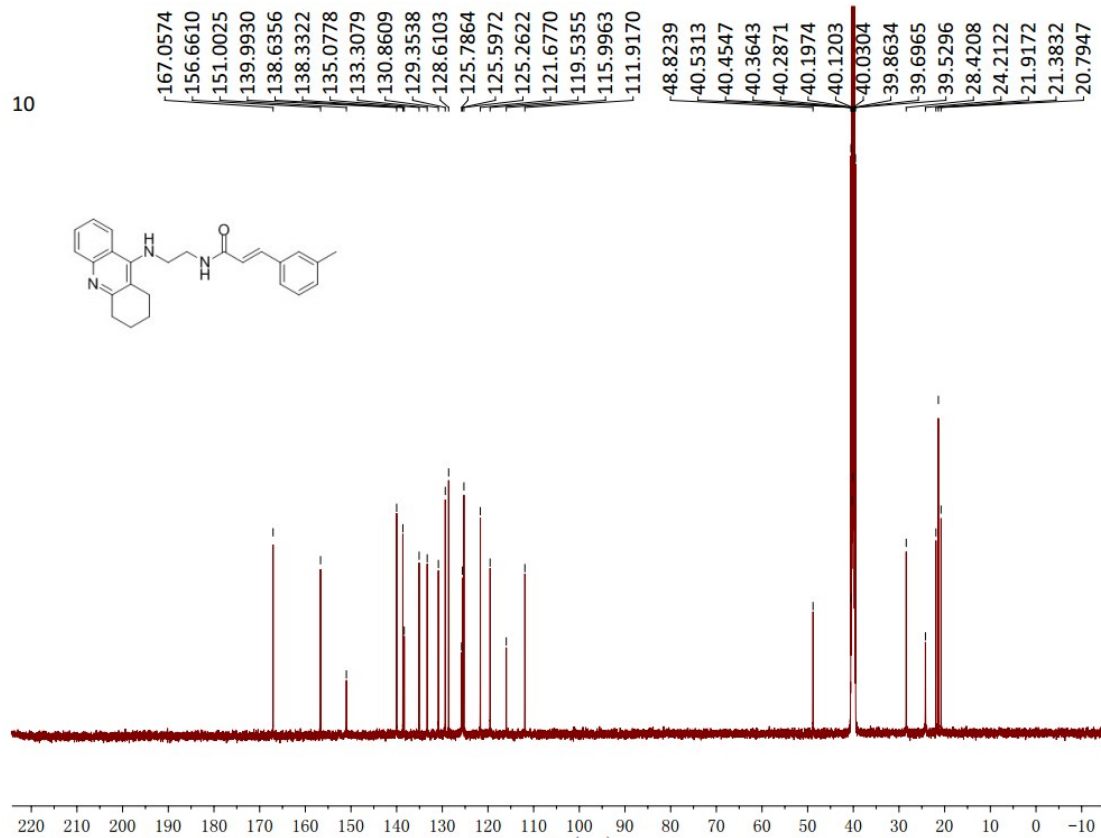

**11** <sup>1</sup>H NMR spectrum

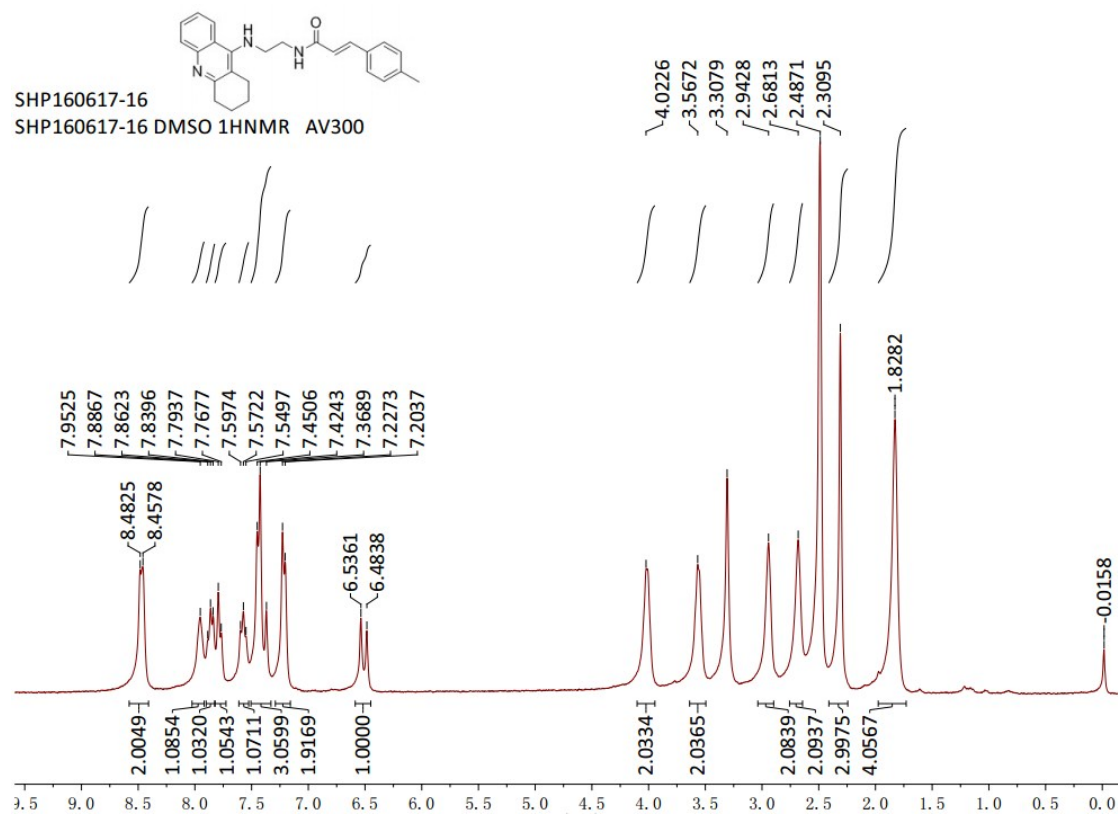

**11** <sup>13</sup>C NMR spectrum

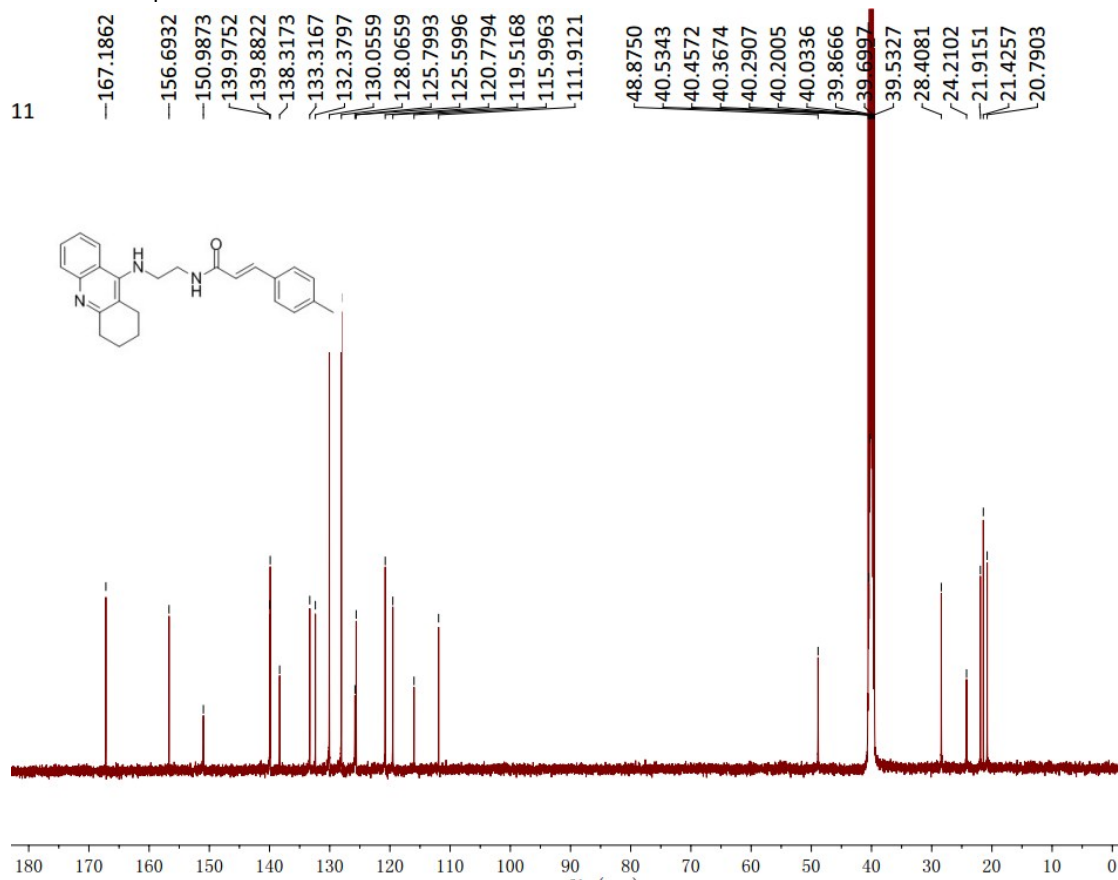

**12** <sup>1</sup>H NMR spectrum

SHP160617-10

SHP160617-10 DMSO 1HNMR AV300

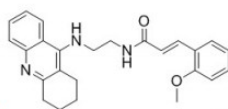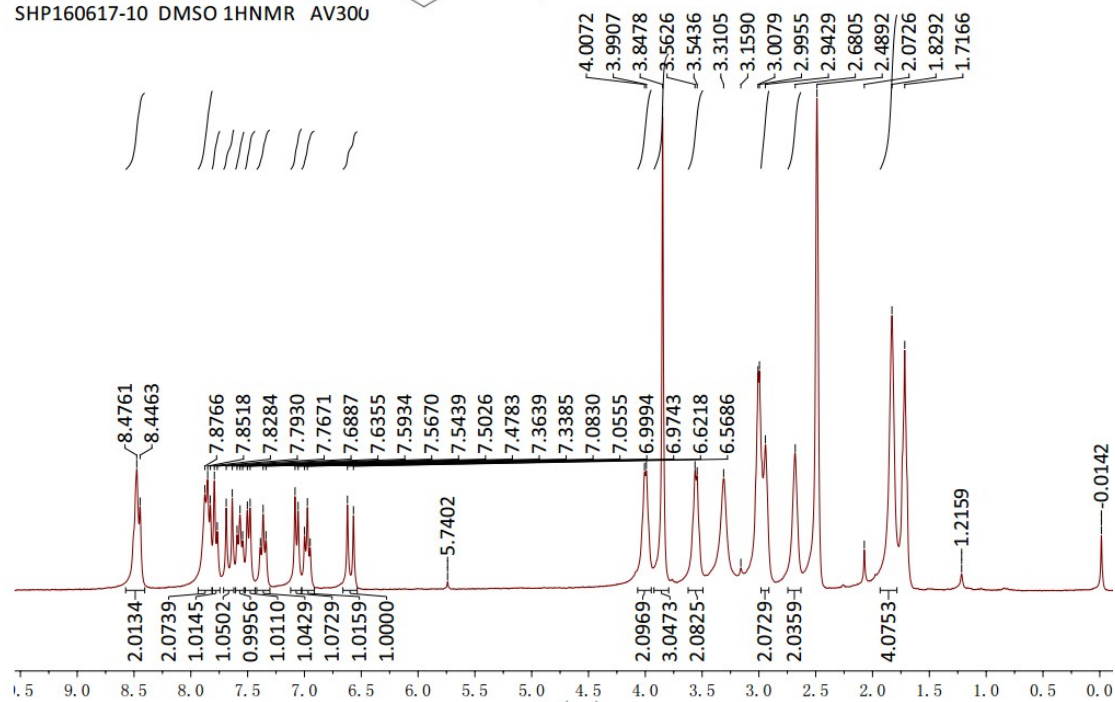

**12** <sup>13</sup>C NMR spectrum

12

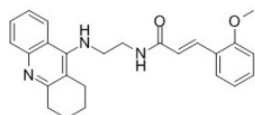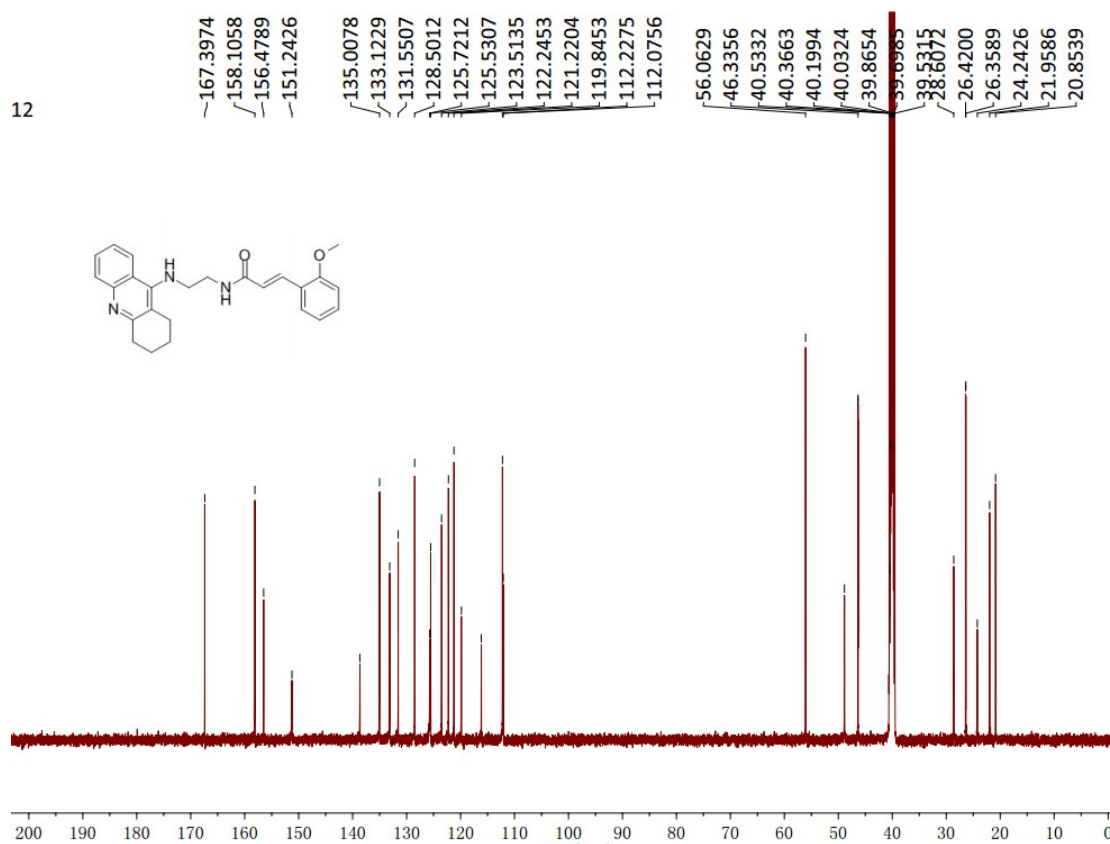



**13** <sup>1</sup>H NMR spectrum

SHP160617-14

SHP160617-14 DMSO 1HNMR AV300

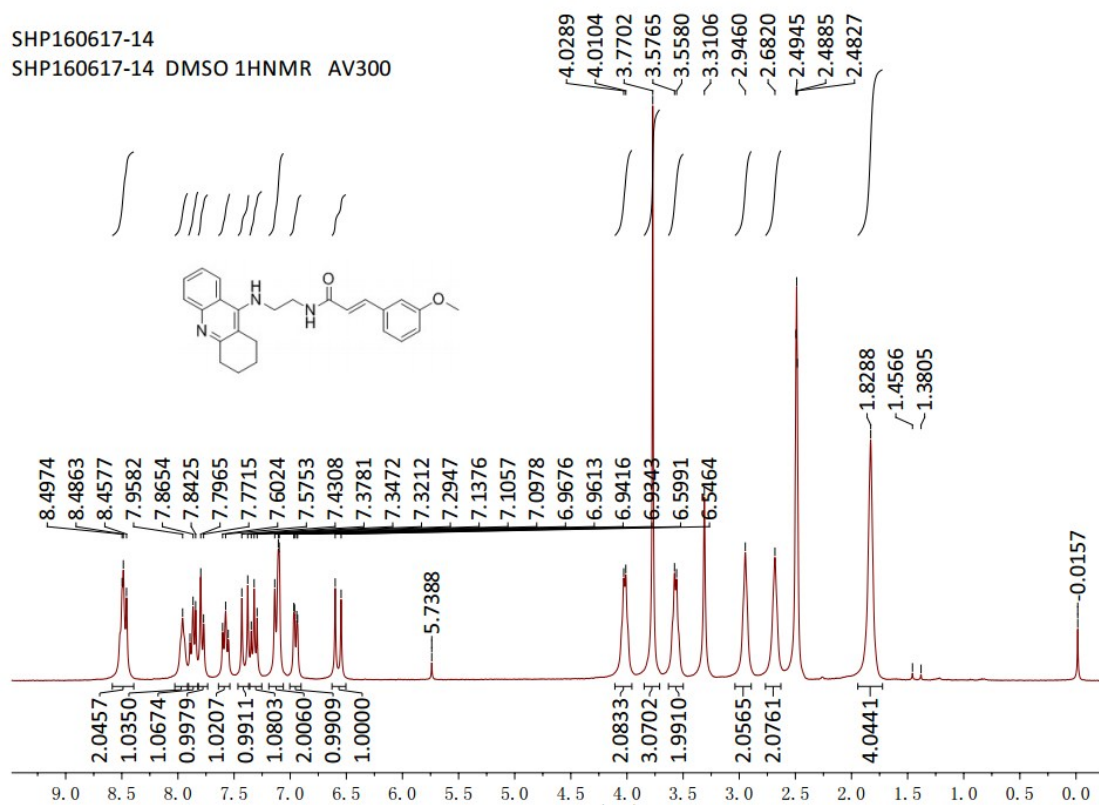

**13** <sup>13</sup>C NMR spectrum

13

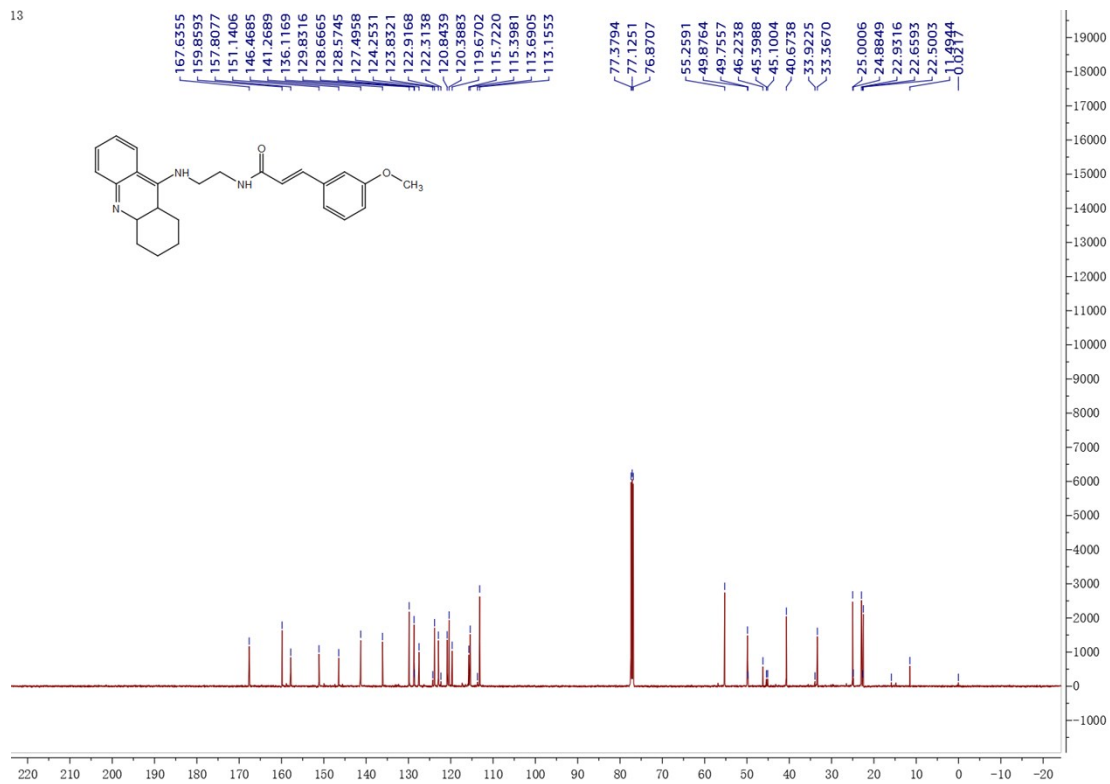

# 14 <sup>1</sup>H NMR spectrum

SHP160603-4  
SHP160603-4 DMSO 1HNMR AV300

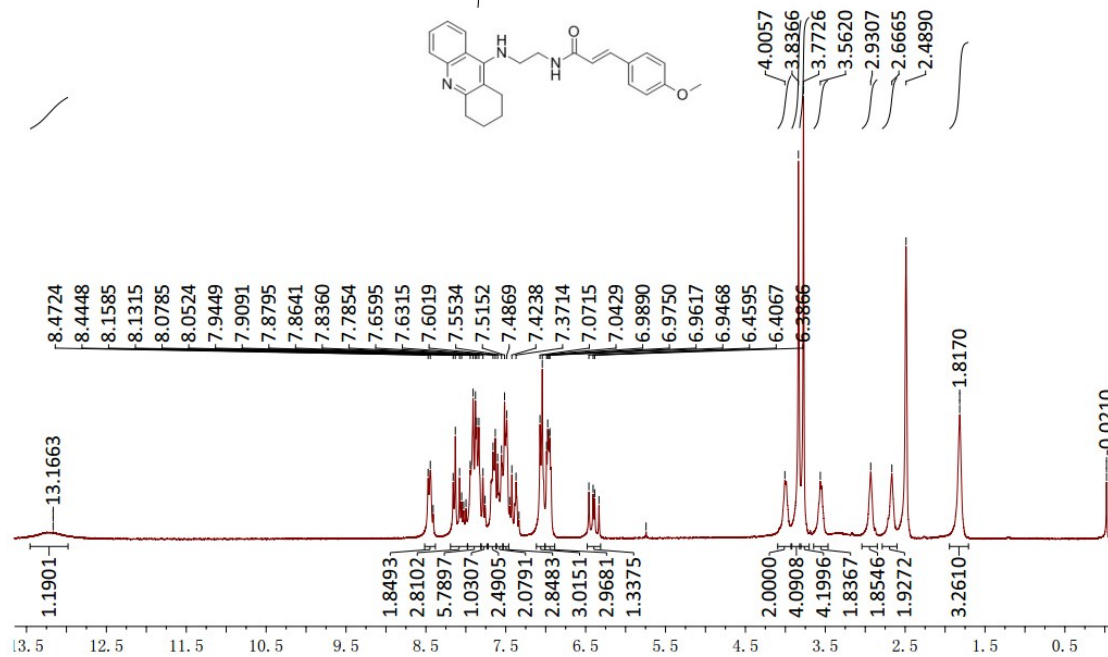

# 14 <sup>13</sup>C NMR spectrum

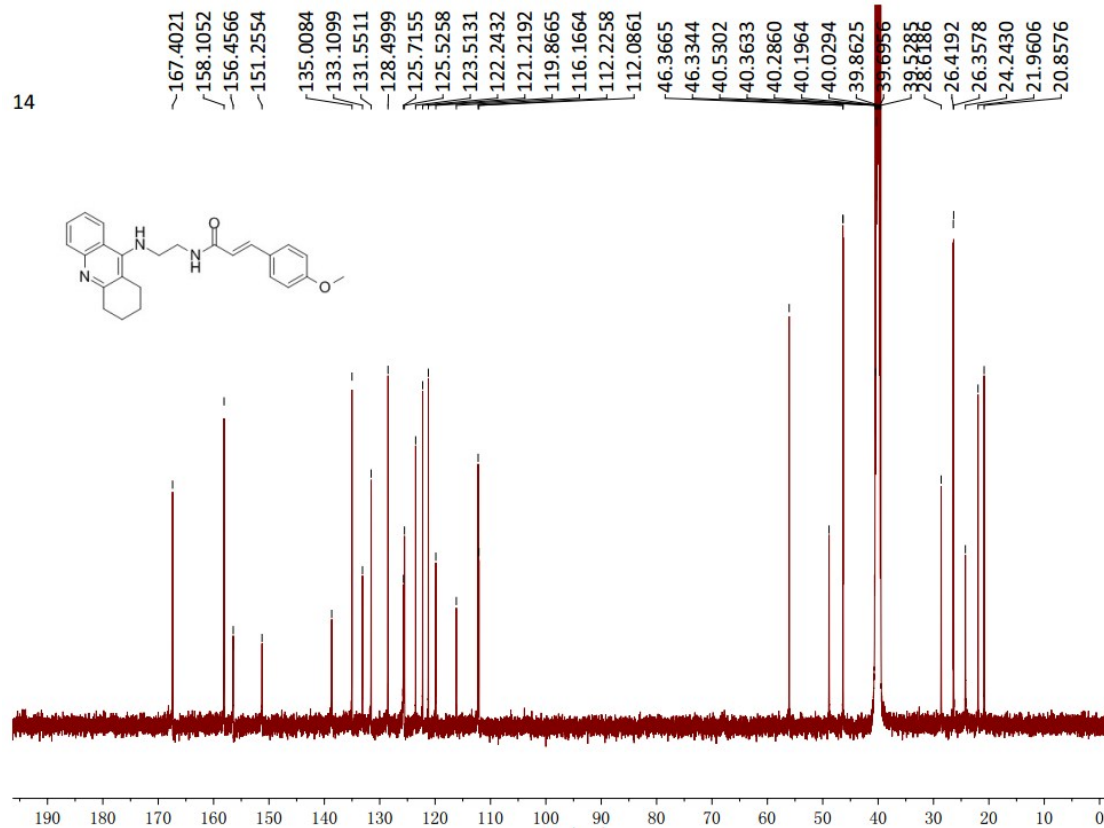



15 <sup>1</sup>H NMR spectrum

SHP160617-12  
 SHP160617-12 DMSO 1HNMR AV300

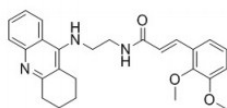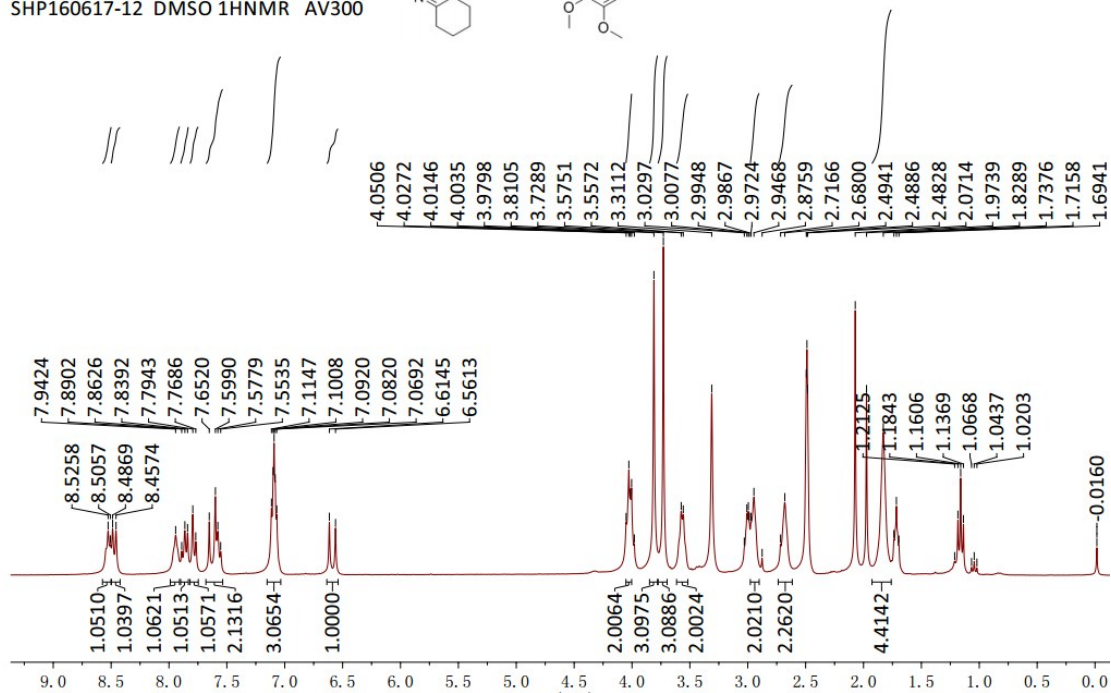

15 <sup>13</sup>C NMR spectrum

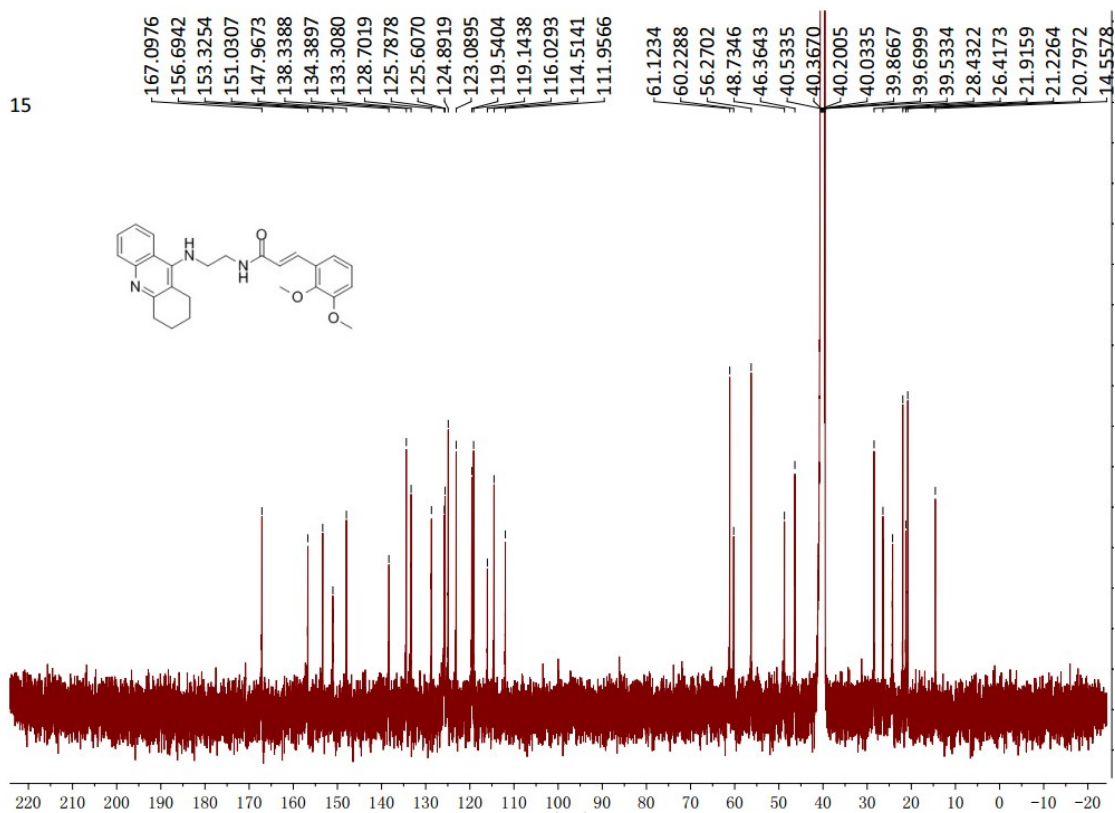

**16** <sup>1</sup>H NMR spectrum

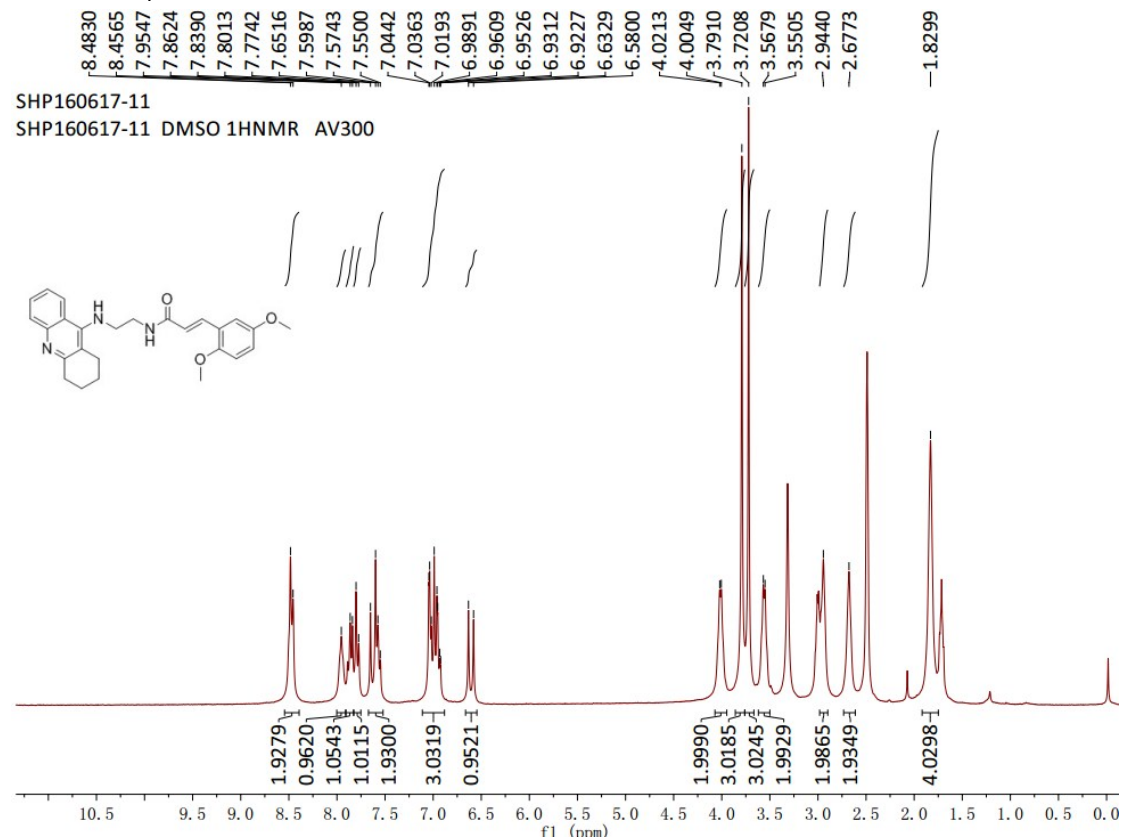

**16** <sup>13</sup>C NMR spectrum

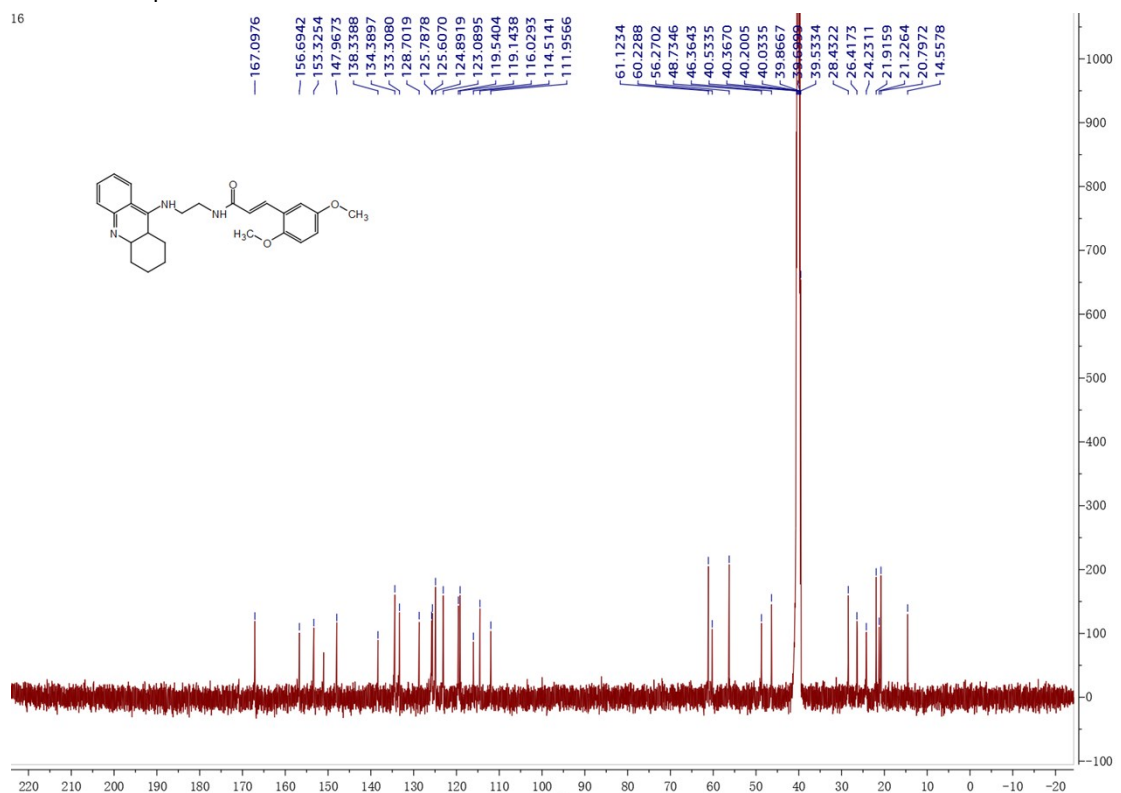

17 <sup>1</sup>H NMR spectrum

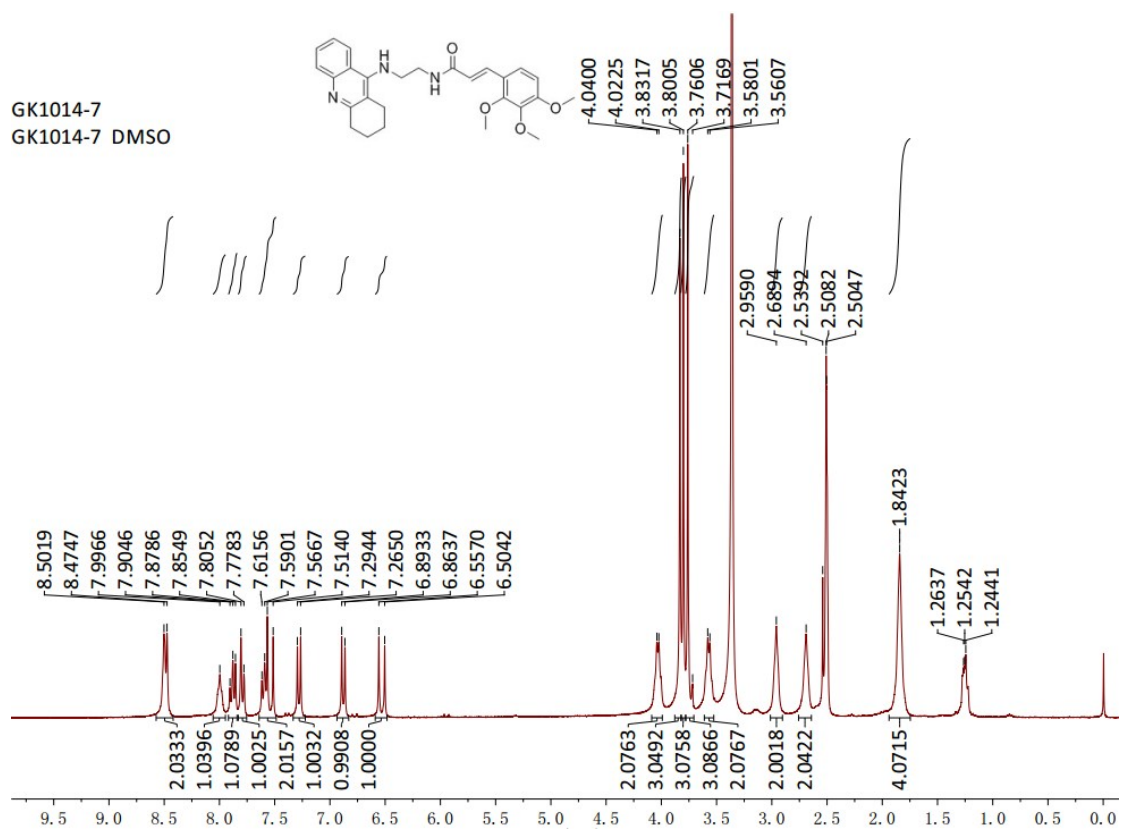

17 <sup>13</sup>C NMR spectrum

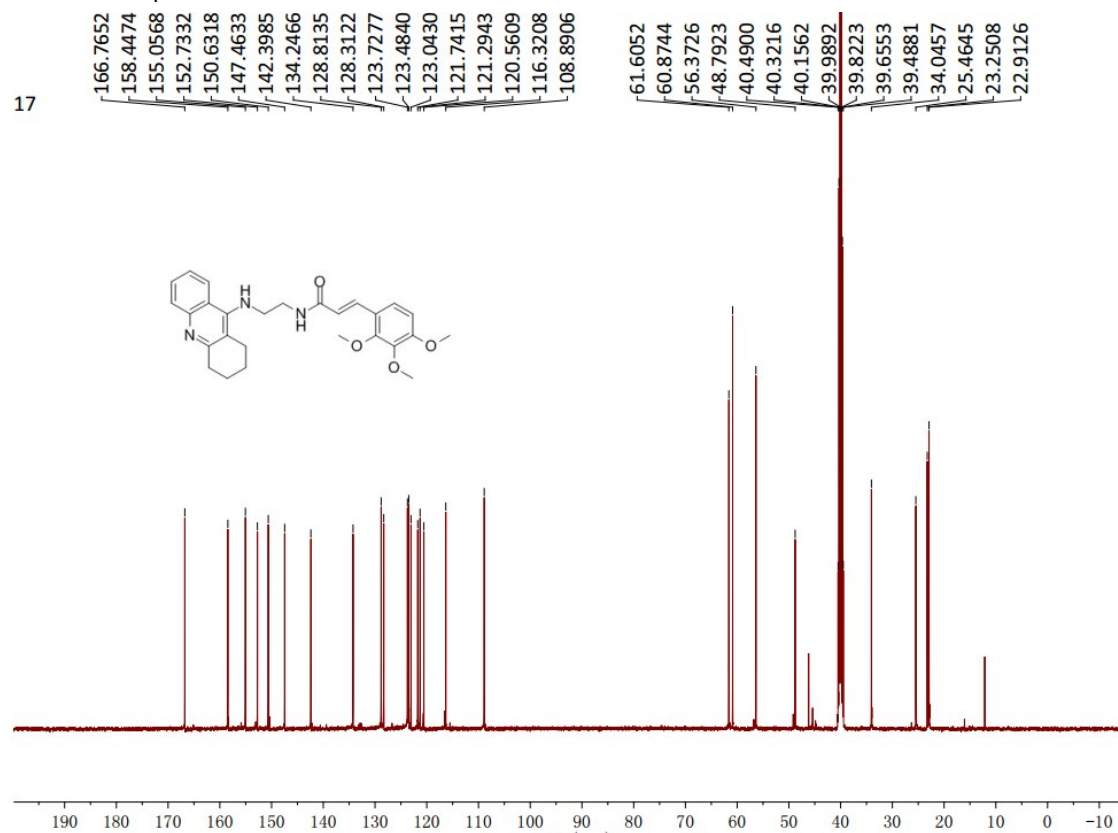

# 18 <sup>1</sup>H NMR spectrum

GK160603-4  
GK160603-4 DMSO 1HNMR AV300

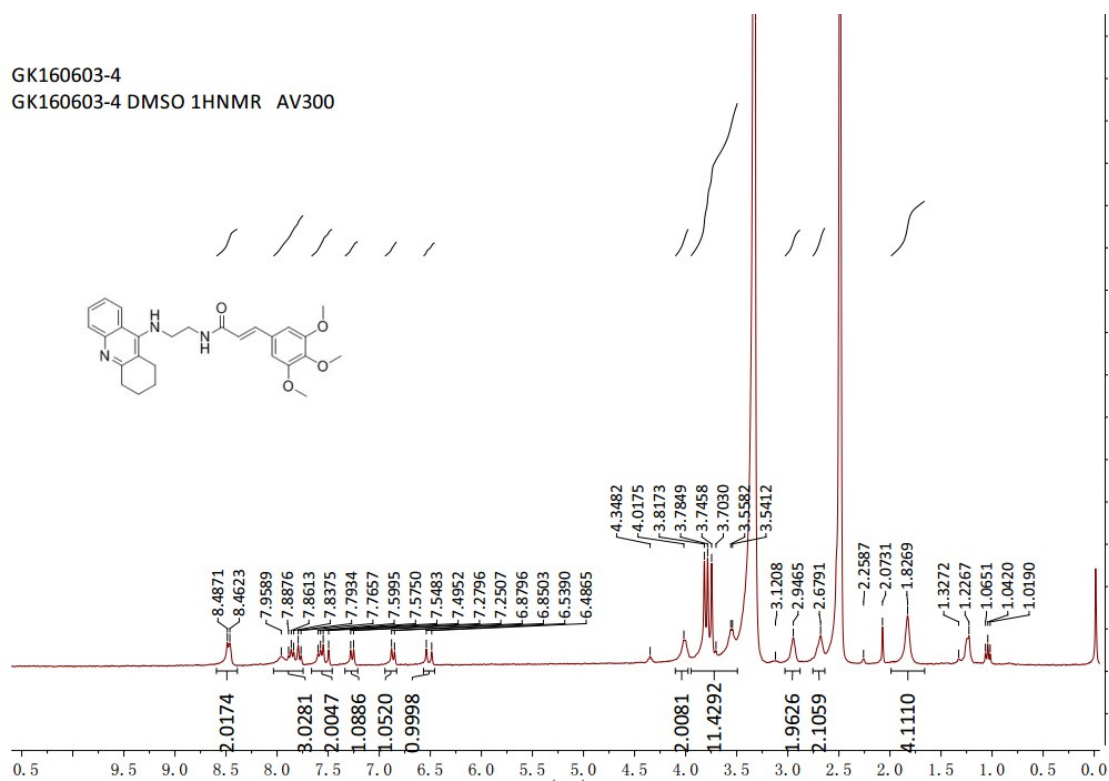

# 18 <sup>13</sup>C NMR spectrum

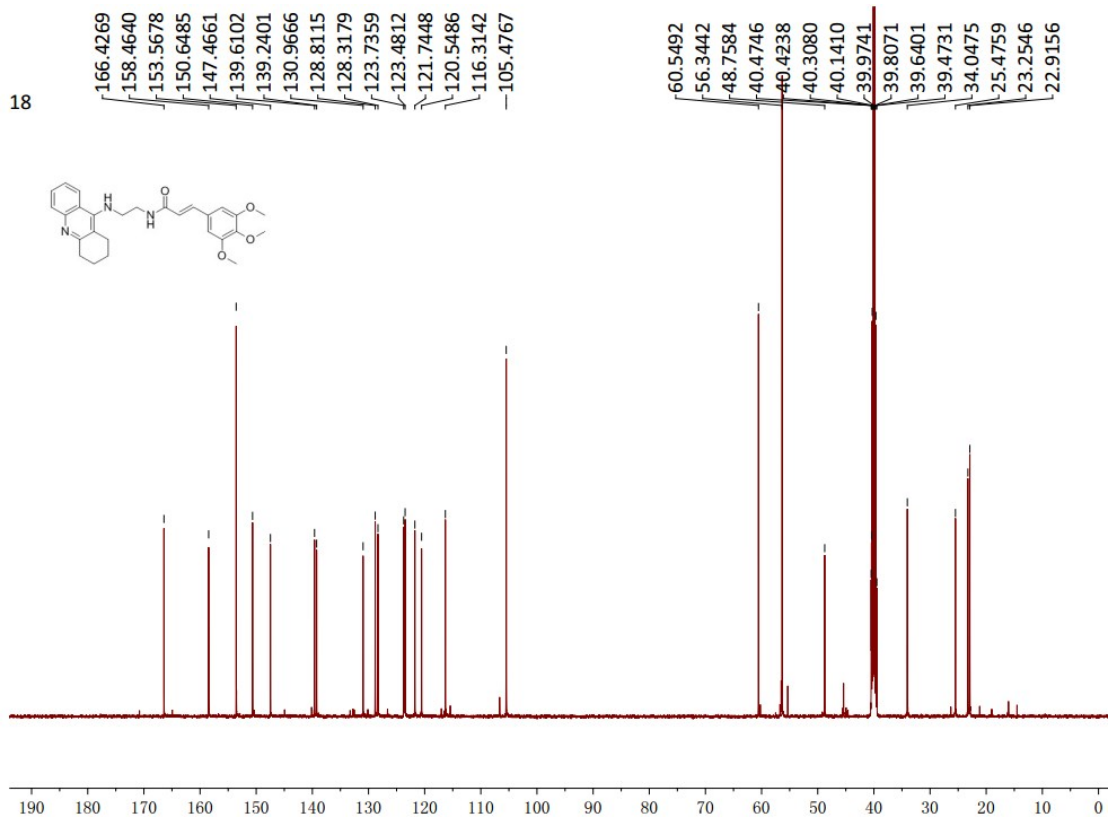

### 19 <sup>1</sup>H NMR spectrum

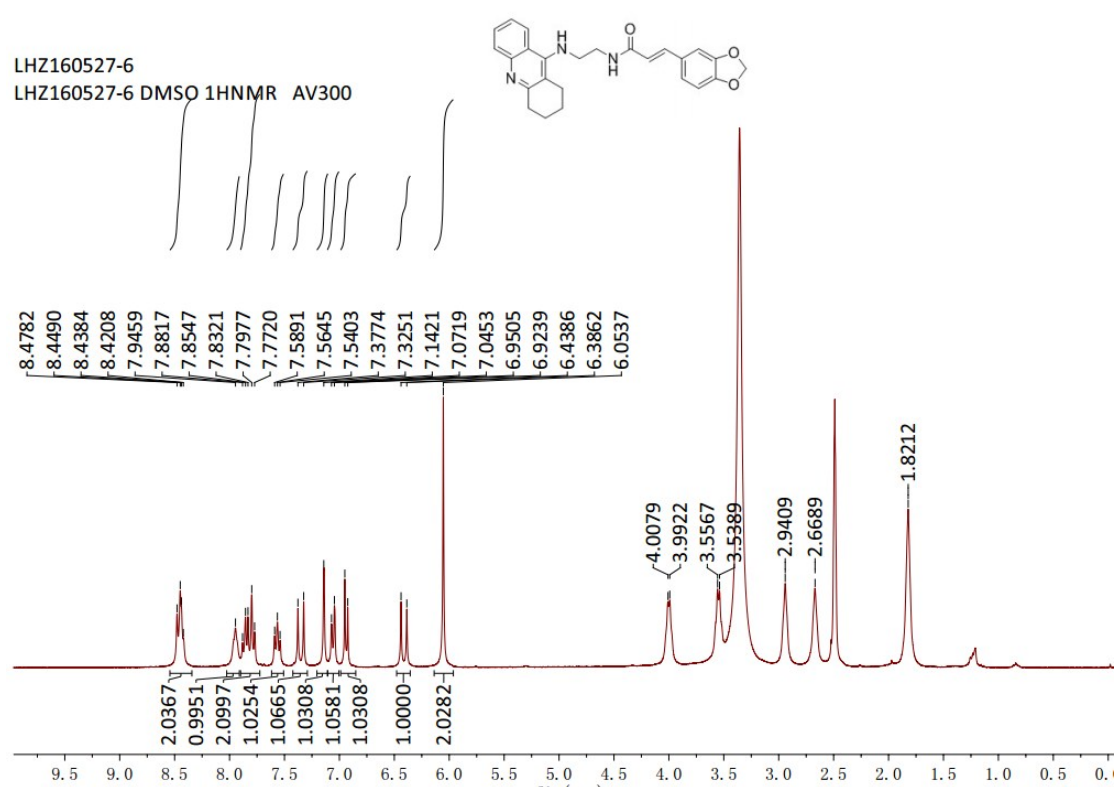

### 19 <sup>13</sup>C NMR spectrum

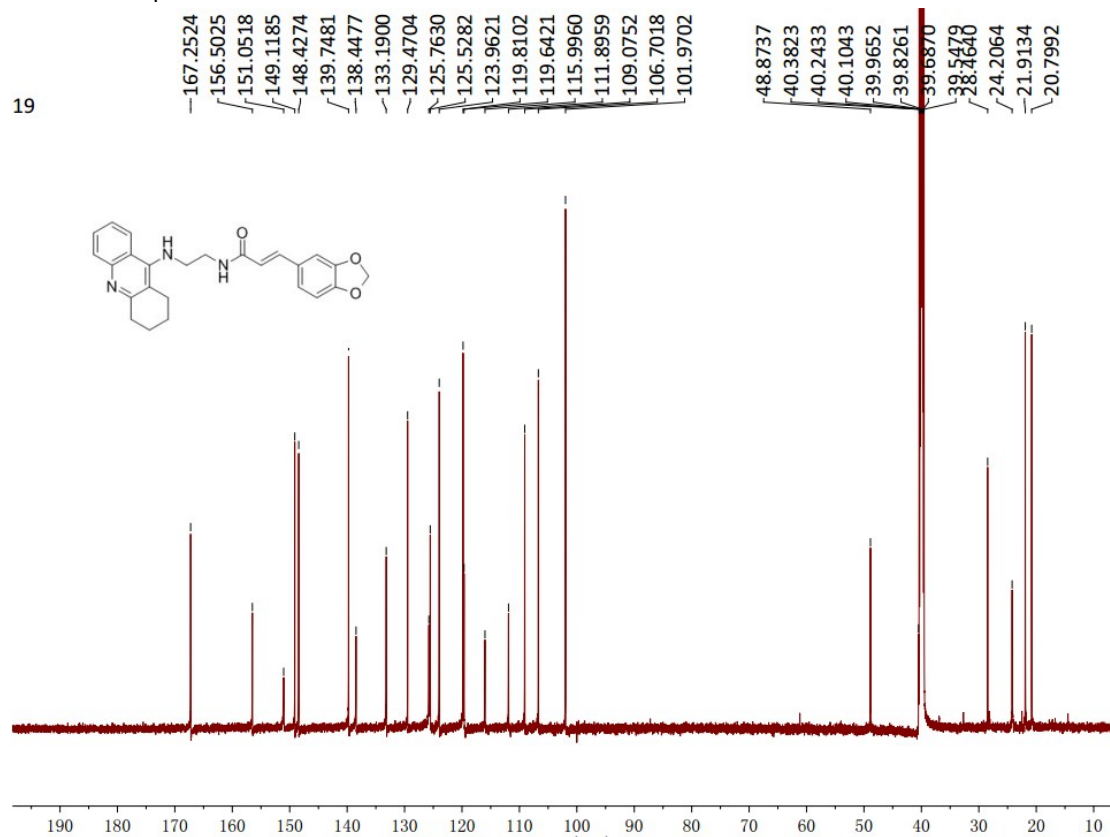



## 20 <sup>1</sup>H NMR spectrum

ZJ0908112  
ZJ0908112 DMSO 1HNMR AV300

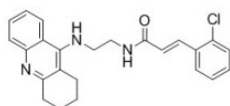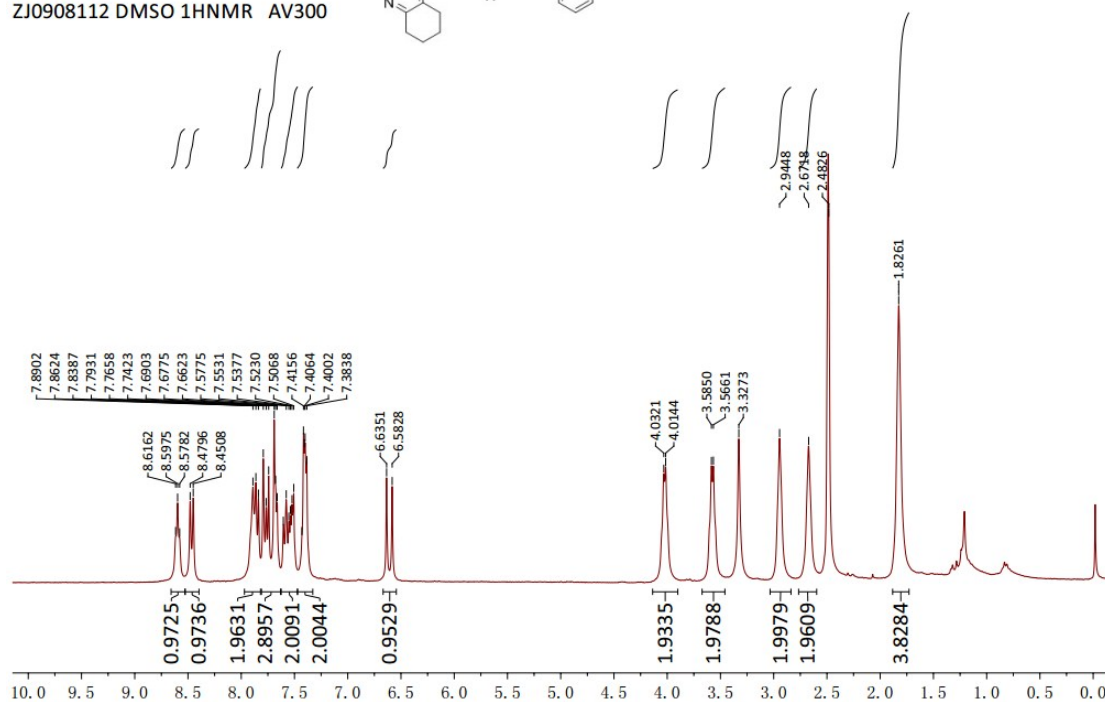

## 20 <sup>13</sup>C NMR spectrum

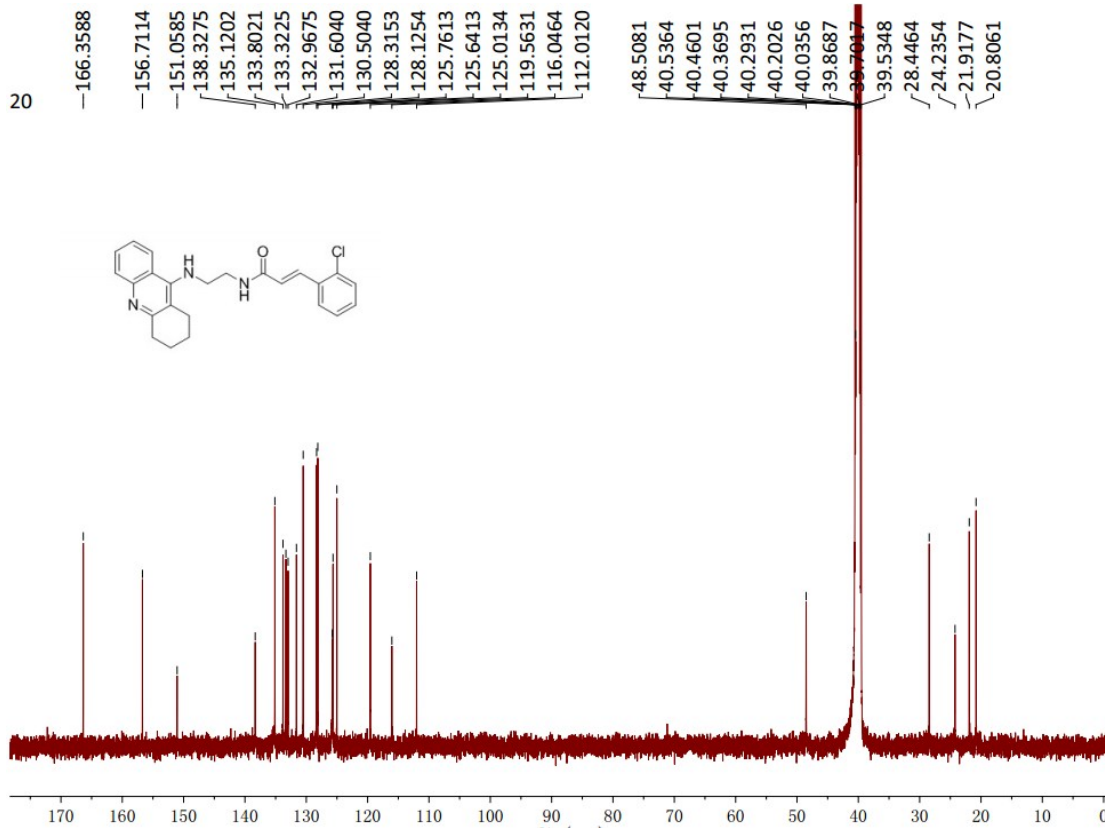



# 21 <sup>1</sup>H NMR spectrum

ZJ-0908113

ZJ-0908113 DMSO 1HNMR AV300

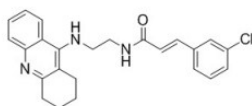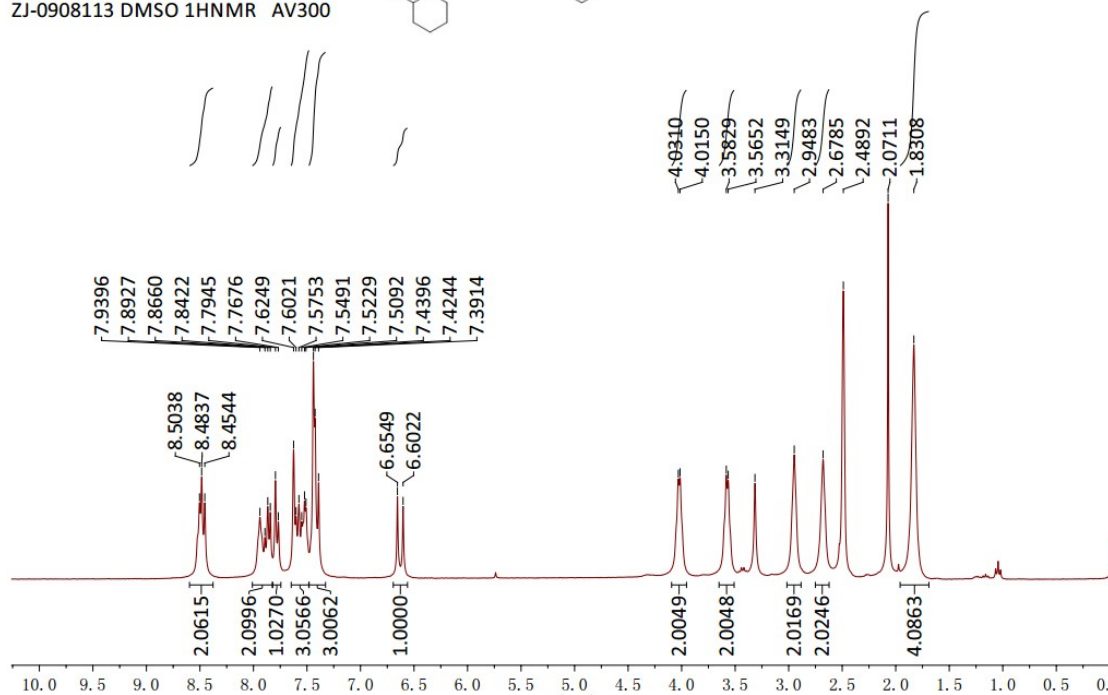

# 21 <sup>13</sup>C NMR spectrum

21

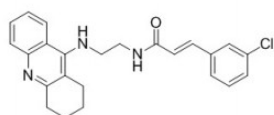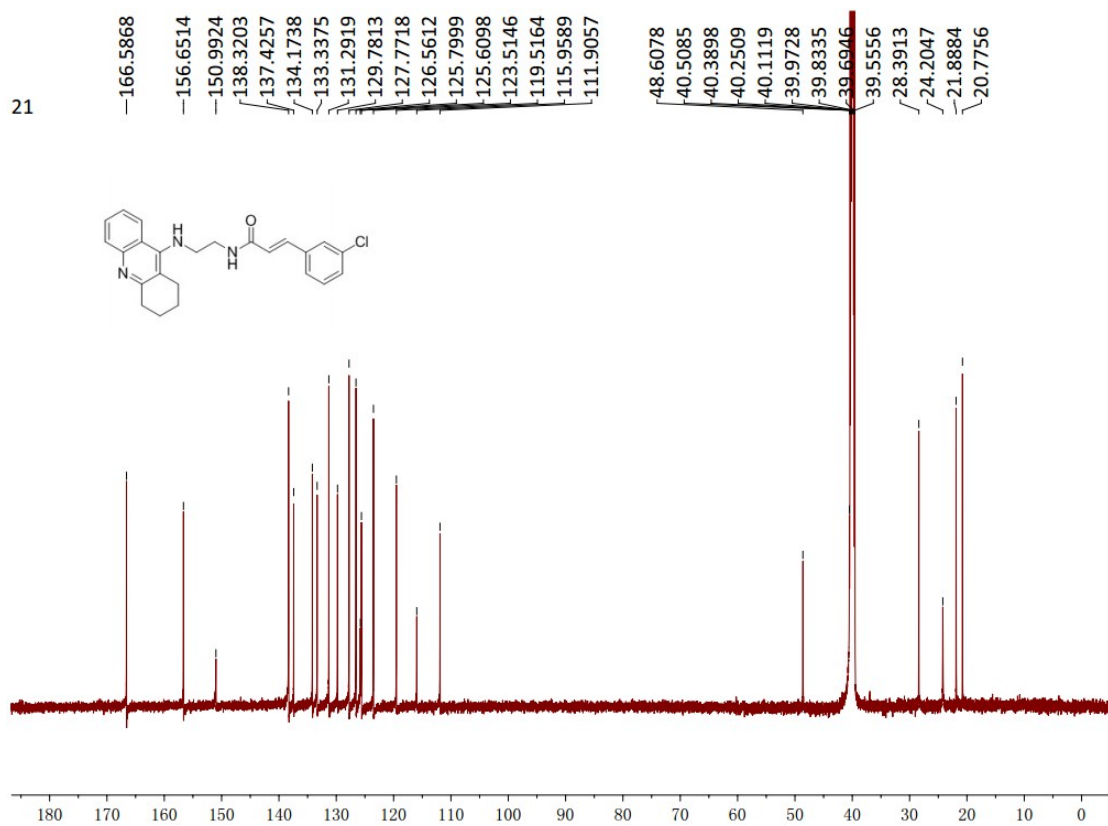

## 22 <sup>1</sup>H NMR spectrum

ZJ-0908114

ZJ-0908114 DMSO 1HNMR AV300

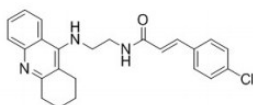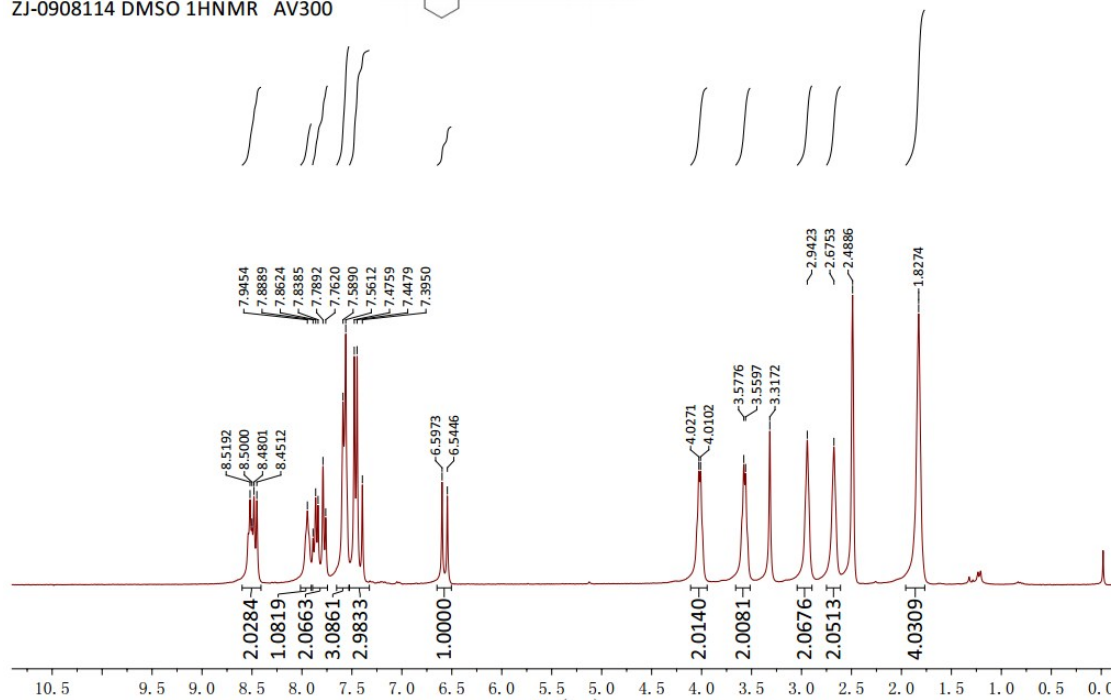

## 22 <sup>13</sup>C NMR spectrum

22

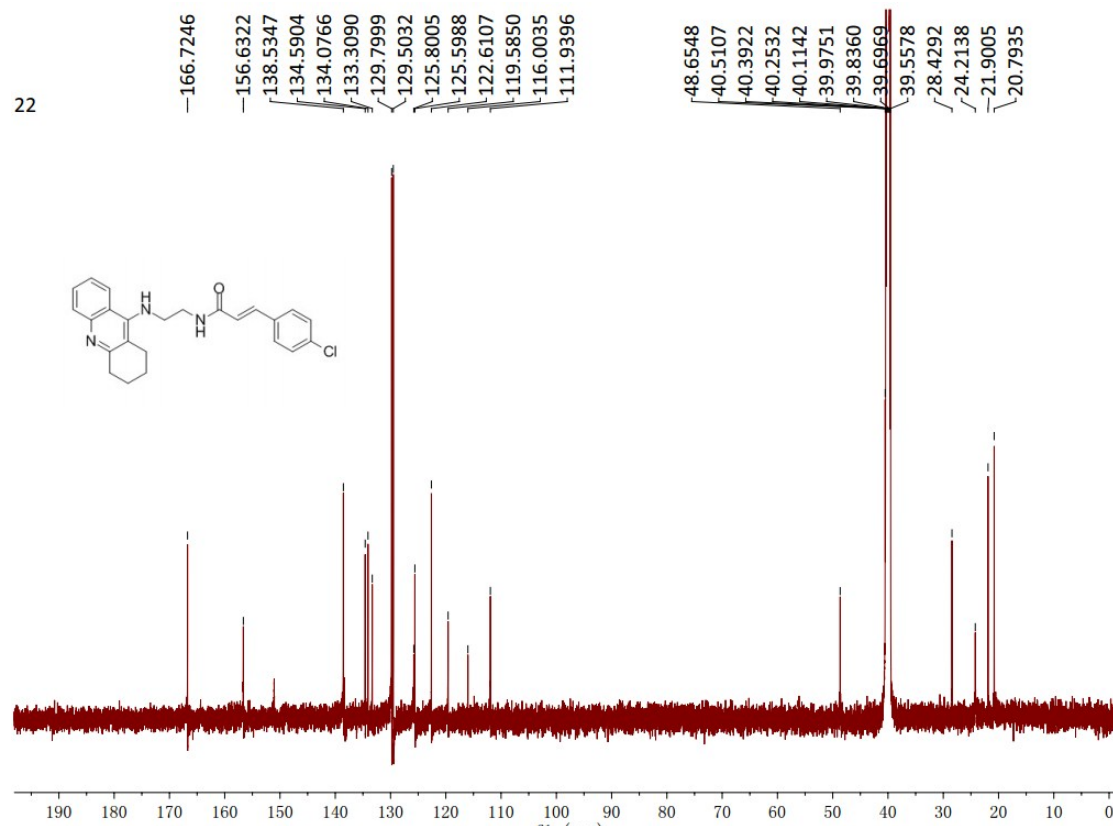

### 23 <sup>1</sup>H NMR spectrum

ZJ-0908115

ZJ-0908115 DMSO 1HNMR AV300

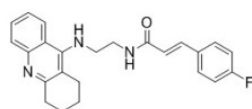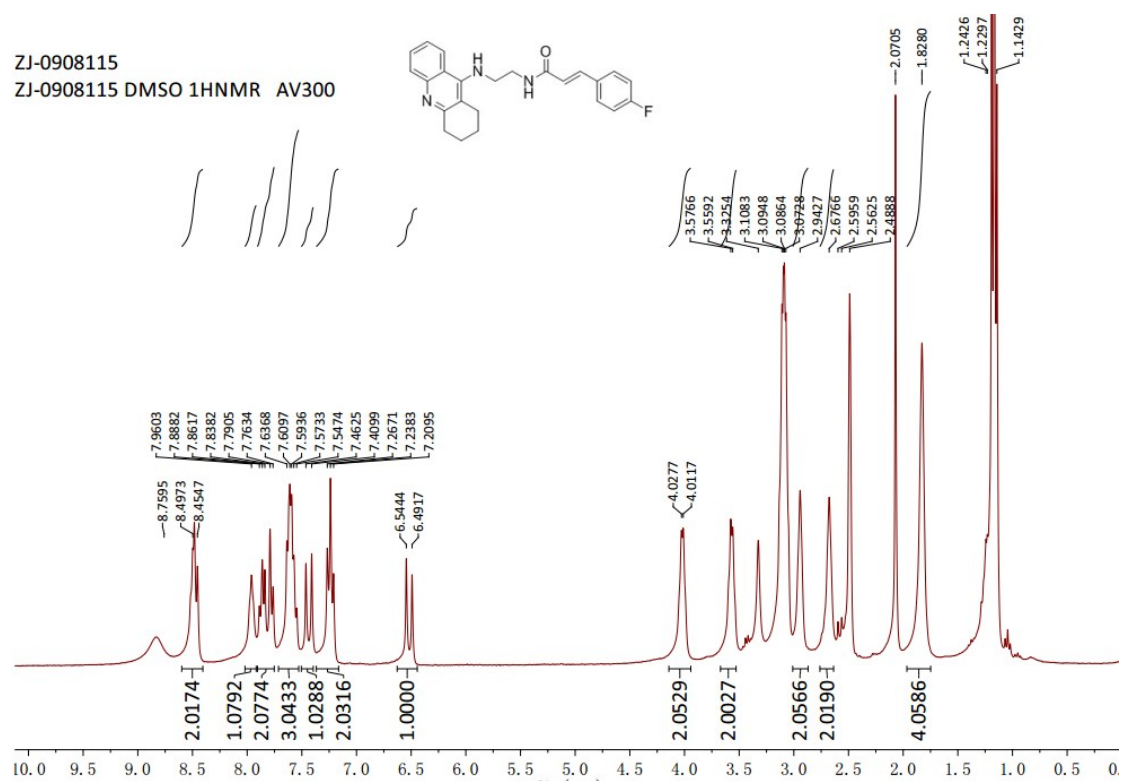

### 23 <sup>13</sup>C NMR spectrum

23

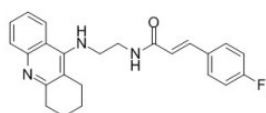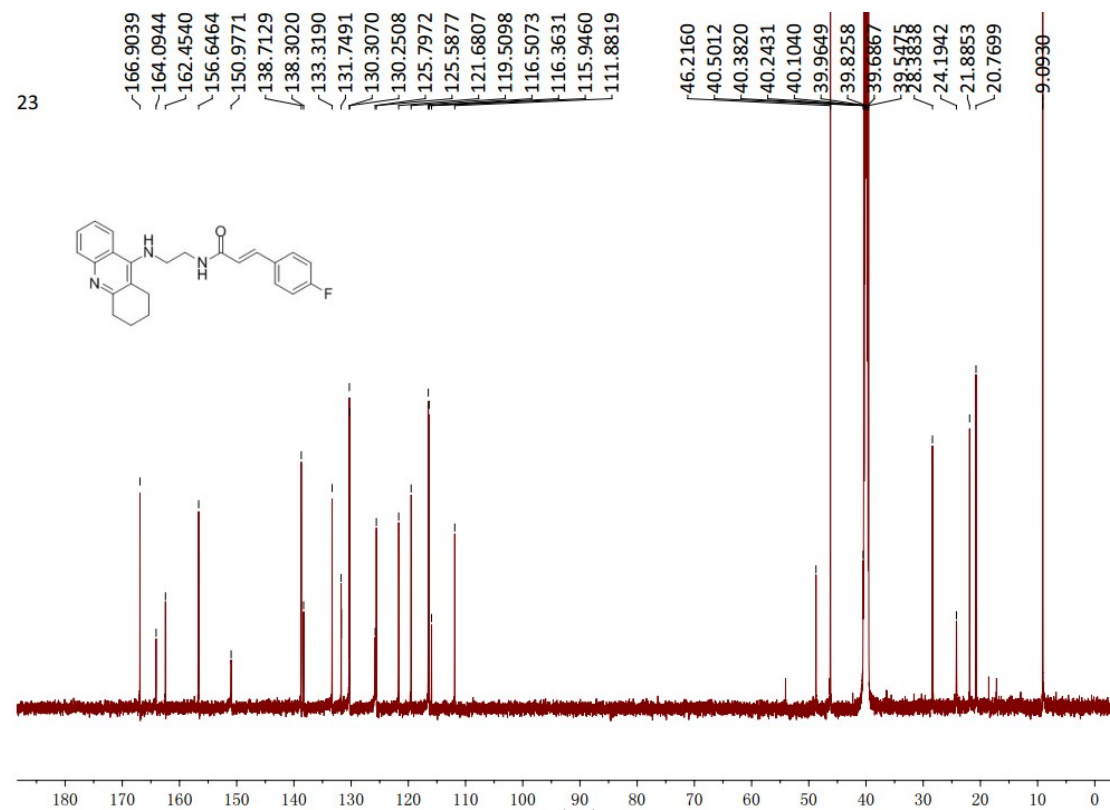

### 24 <sup>1</sup>H NMR spectrum

GK1014-8  
GK1014-8 DMSO

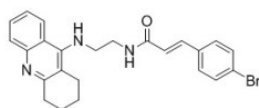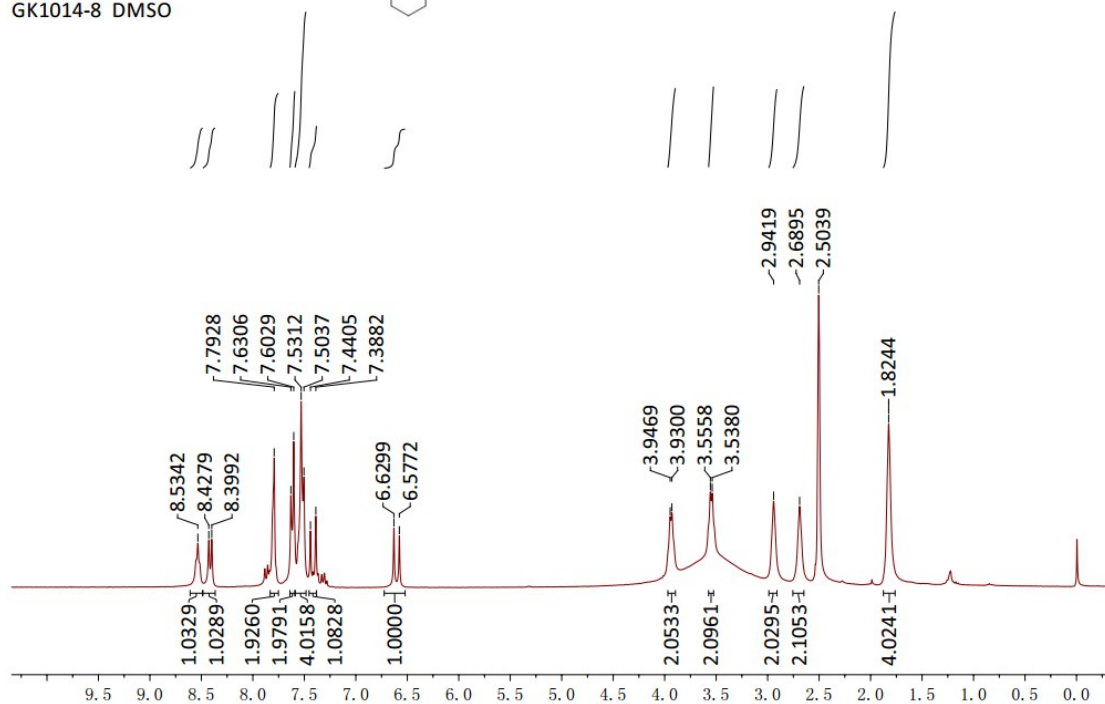

### 24 <sup>13</sup>C NMR spectrum

24

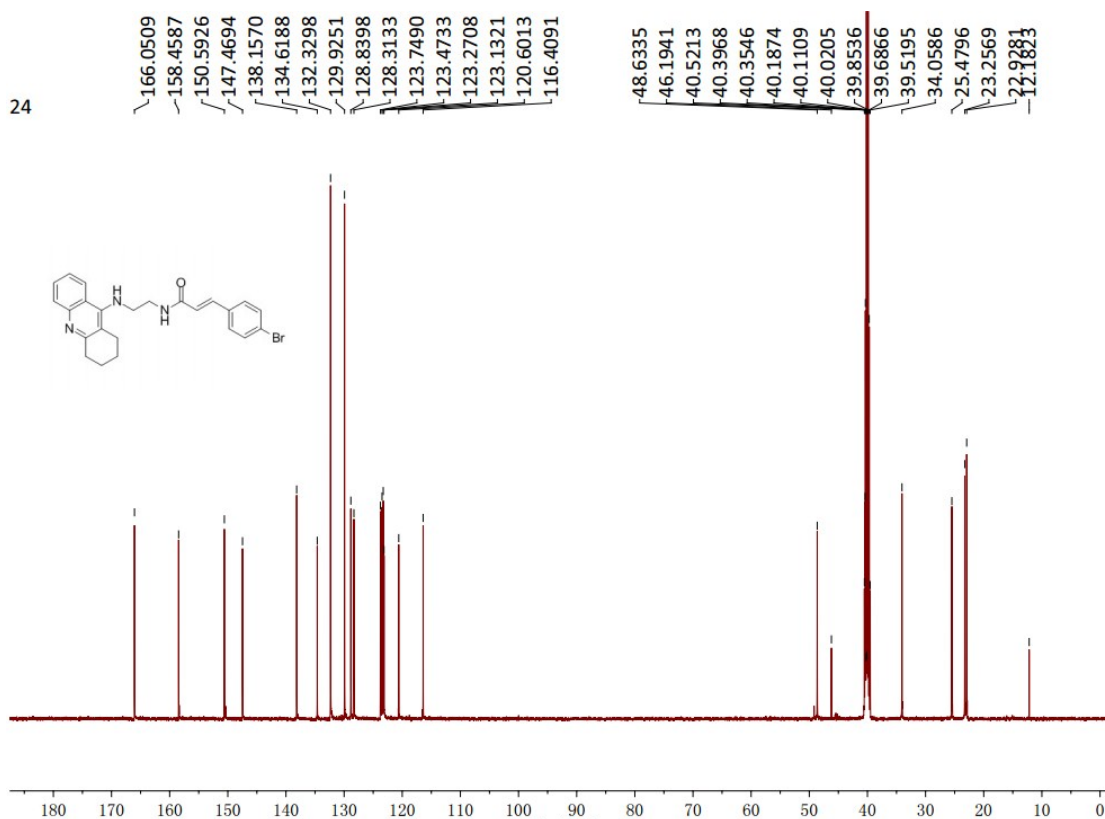

### 25 <sup>1</sup>H NMR spectrum

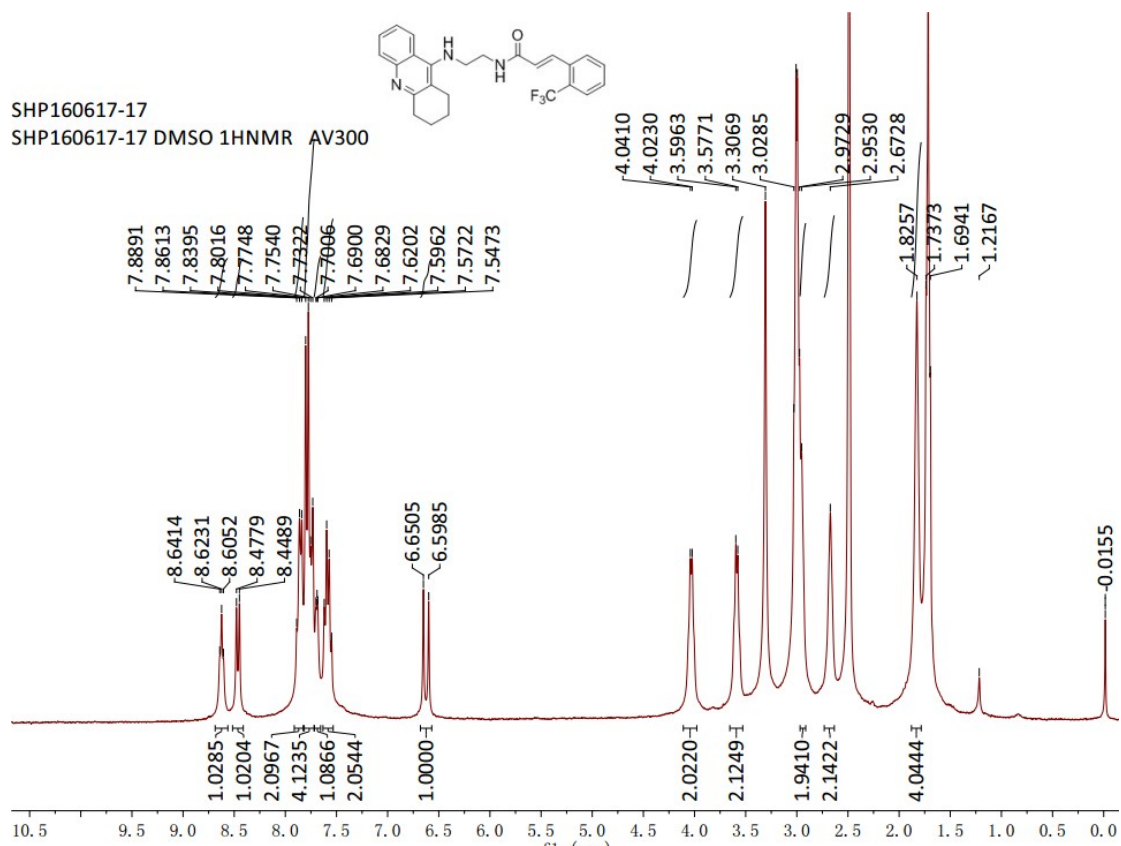

### 25 <sup>13</sup>C NMR spectrum

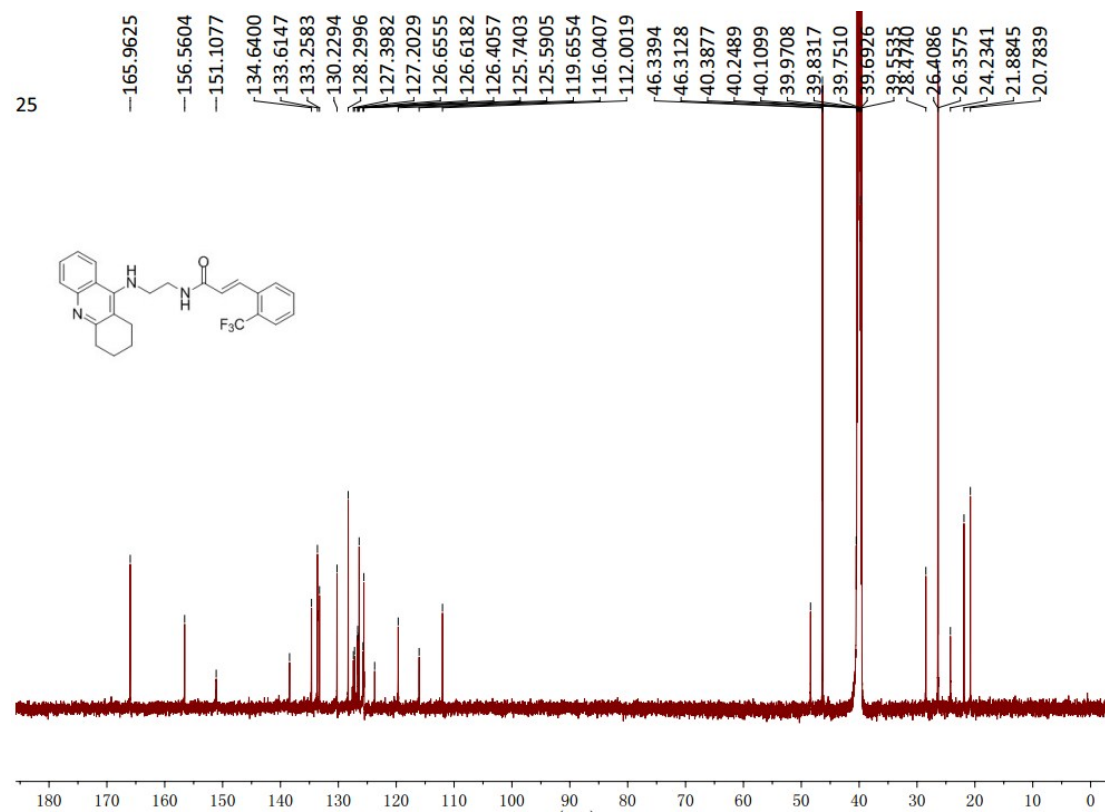



## 26 <sup>1</sup>H NMR spectrum

GK160603-2

GK160603-2 DMSO 1HNMR AV300

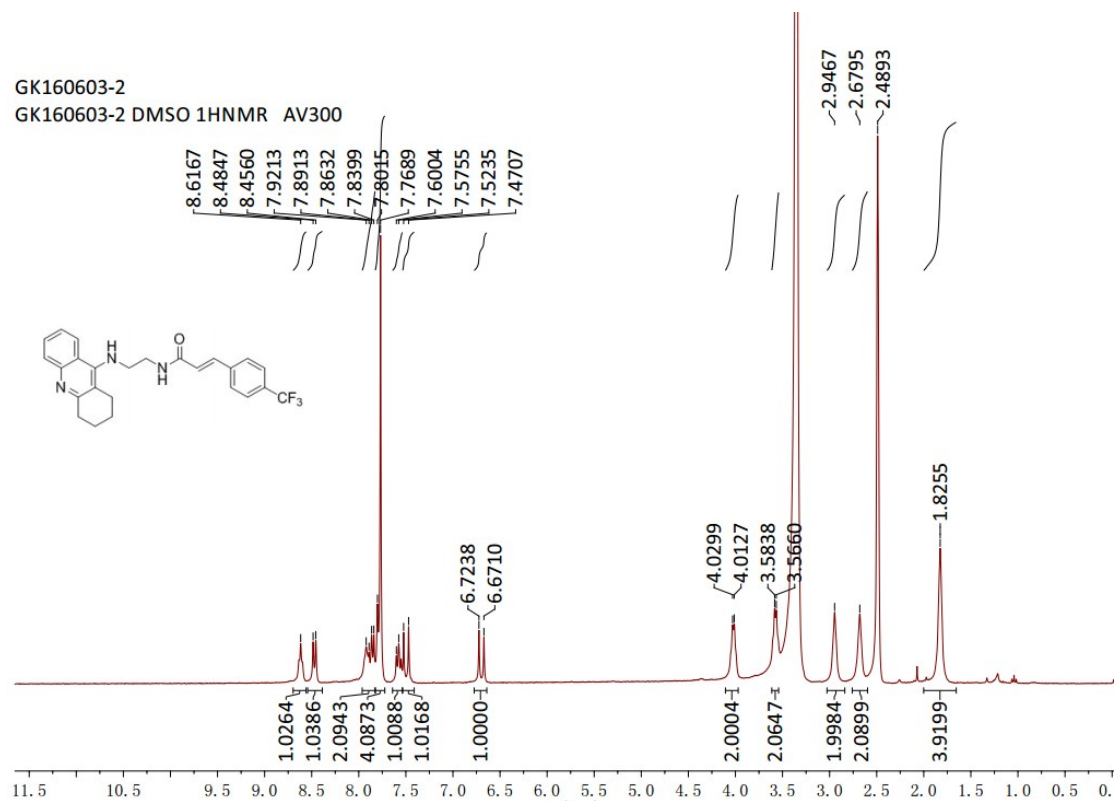

## 26 <sup>13</sup>C NMR spectrum

26

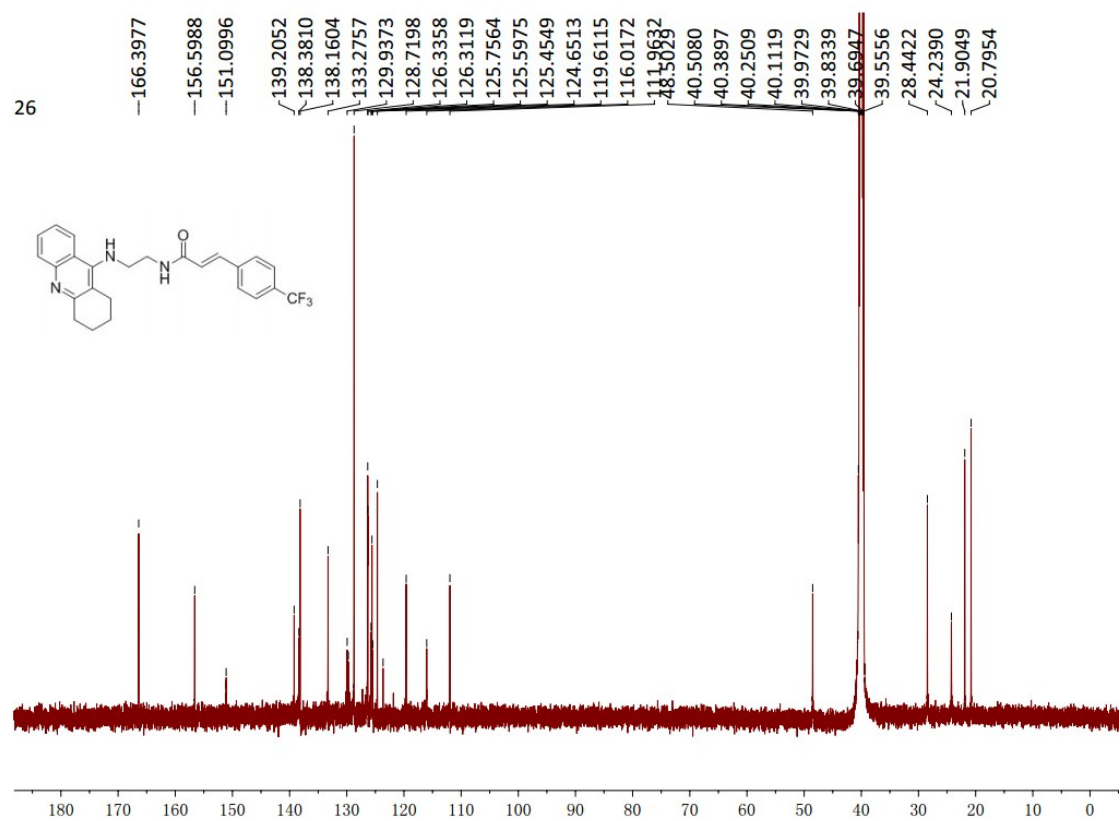



27 <sup>1</sup>H NMR spectrum

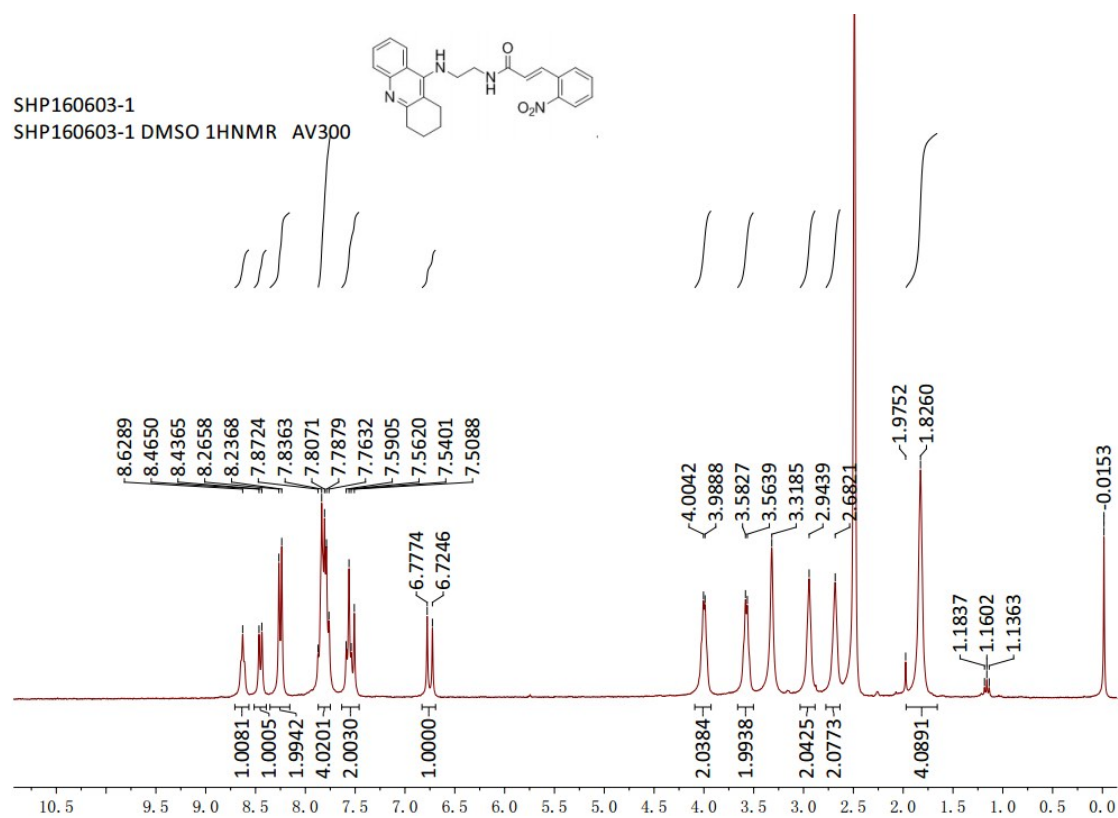

27 <sup>13</sup>C NMR spectrum

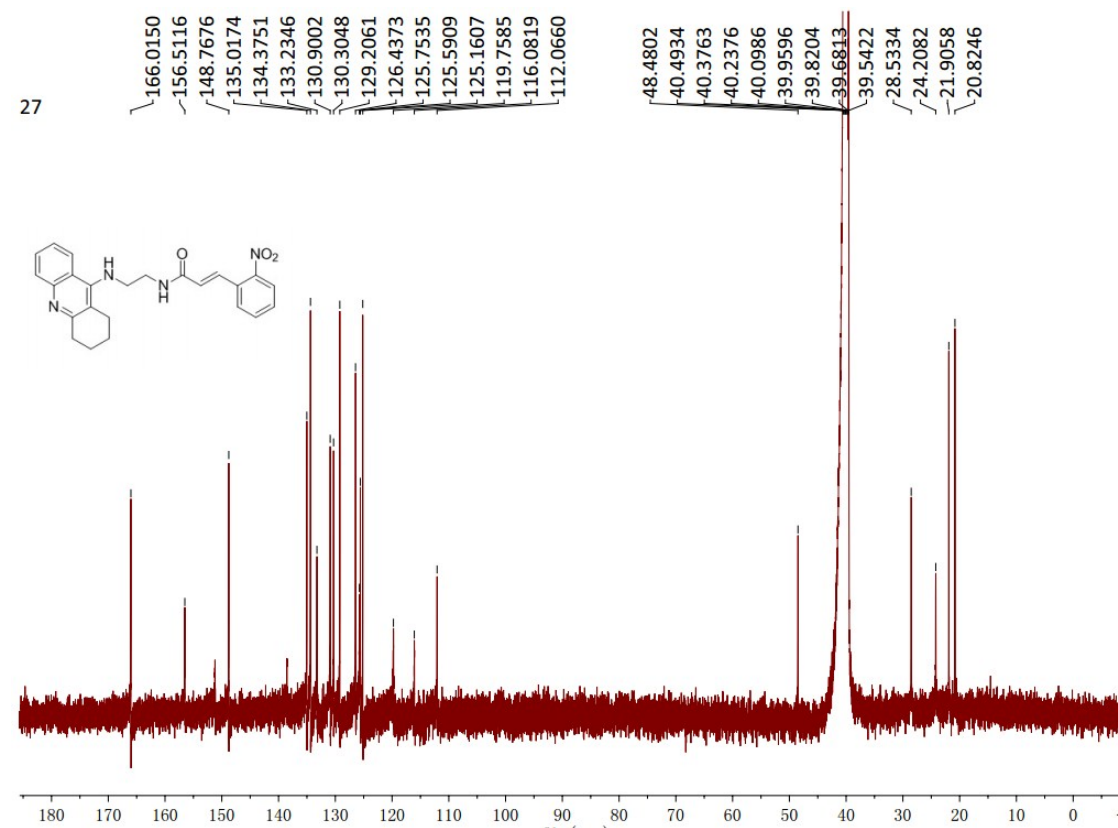

**28**  $^1\text{H}$  NMR spectrum

SHP160603-2  
SHP160603-2 DMSO  $1\text{H}$ NMR AV300

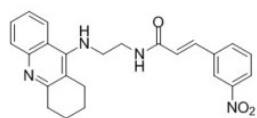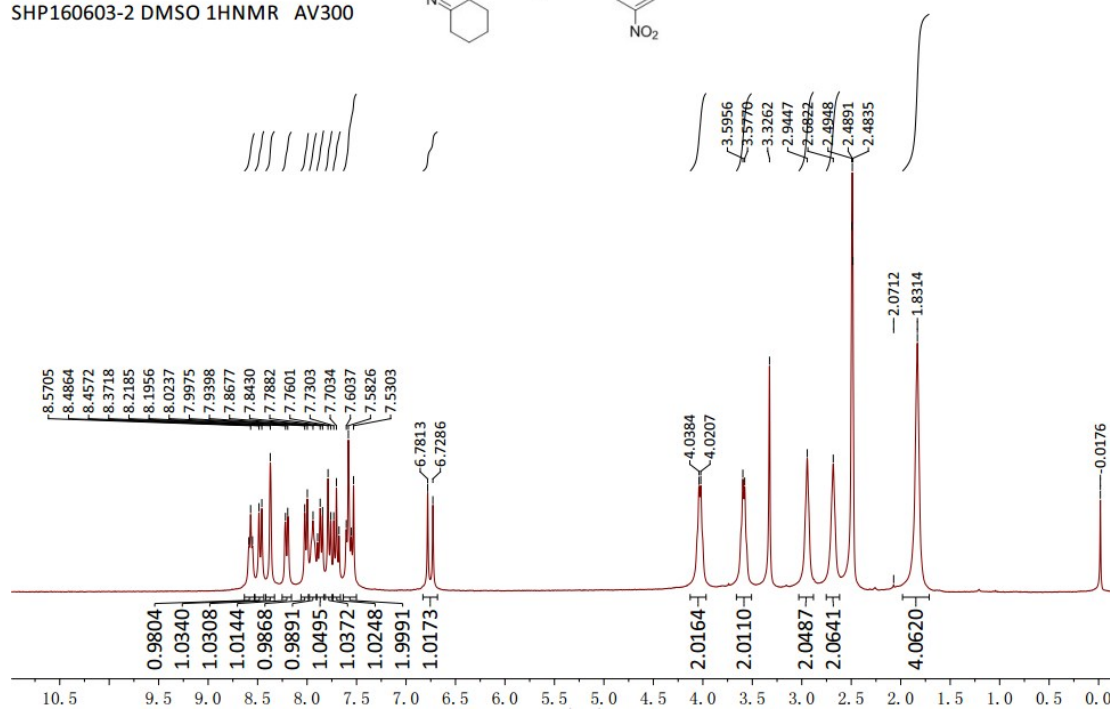

**28**  $^{13}\text{C}$  NMR spectrum

28

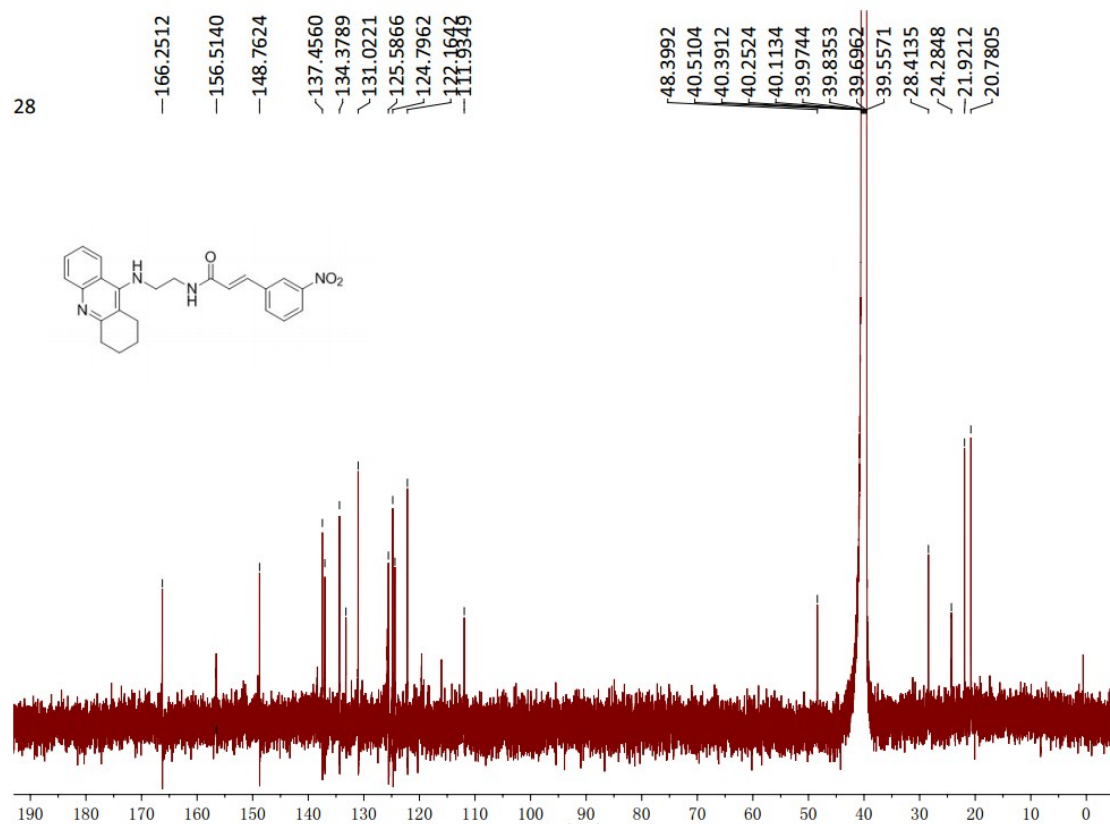

# 29 <sup>1</sup>H NMR spectrum

SHP160603-3  
SHP160603-3 DMSO 1HNMR AV300

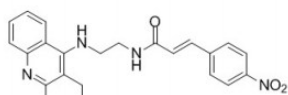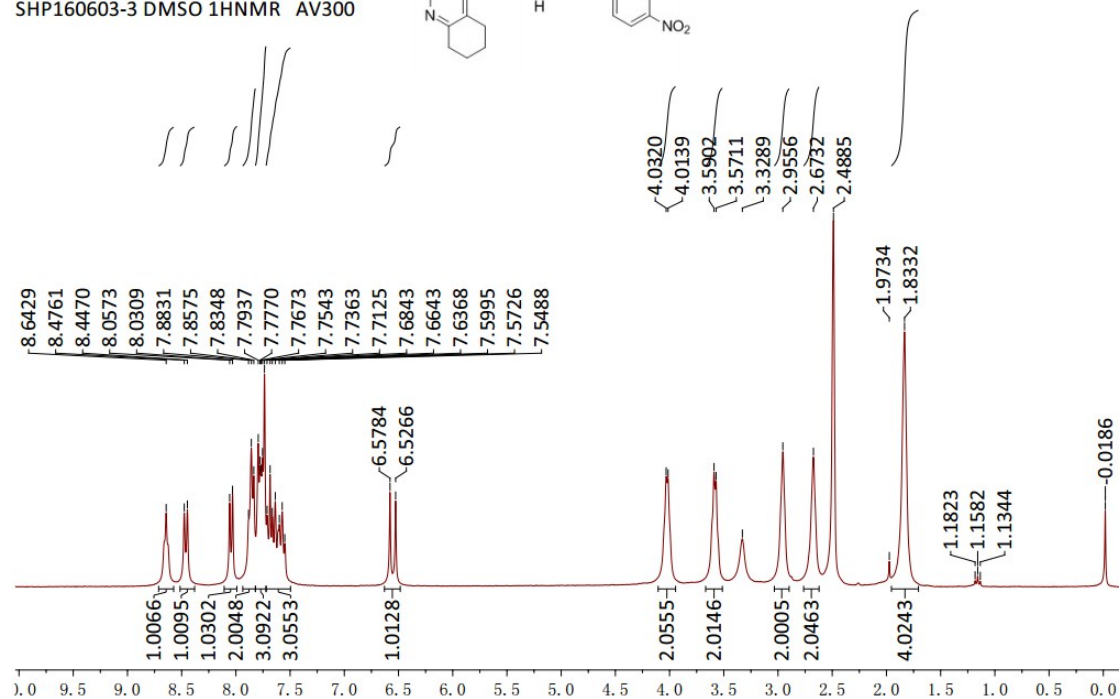

# 29 <sup>13</sup>C NMR spectrum

29

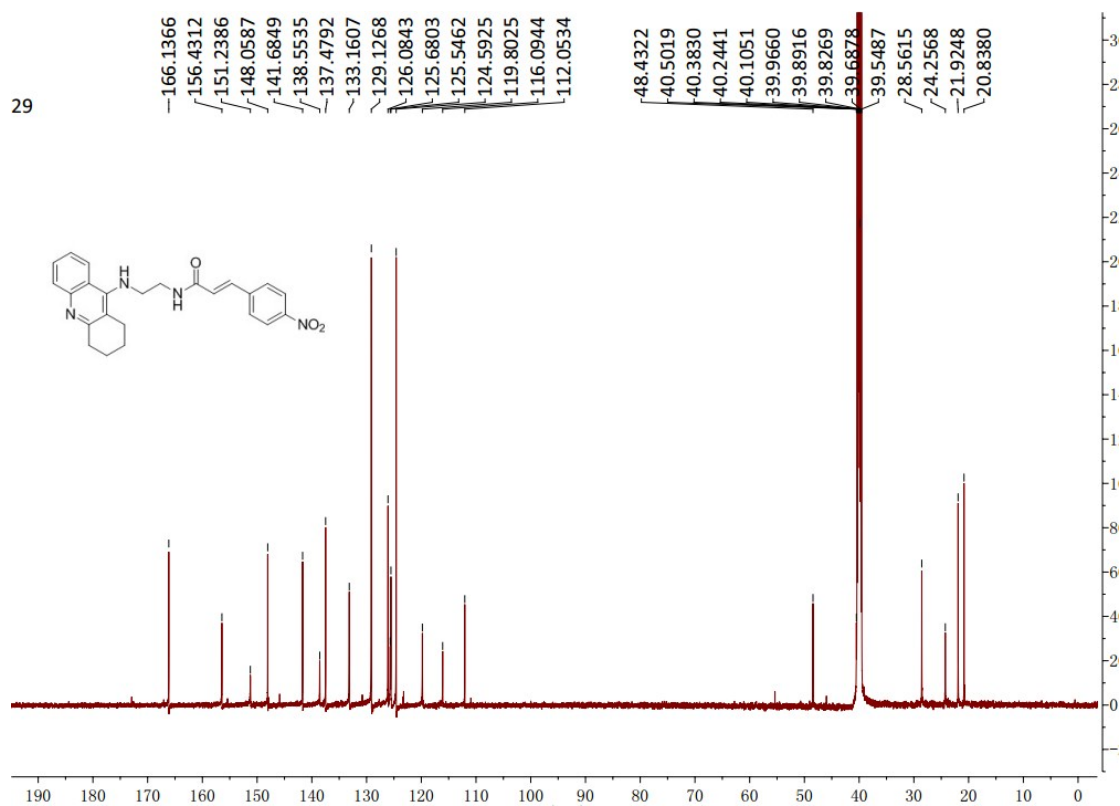

### 30 <sup>1</sup>H NMR spectrum

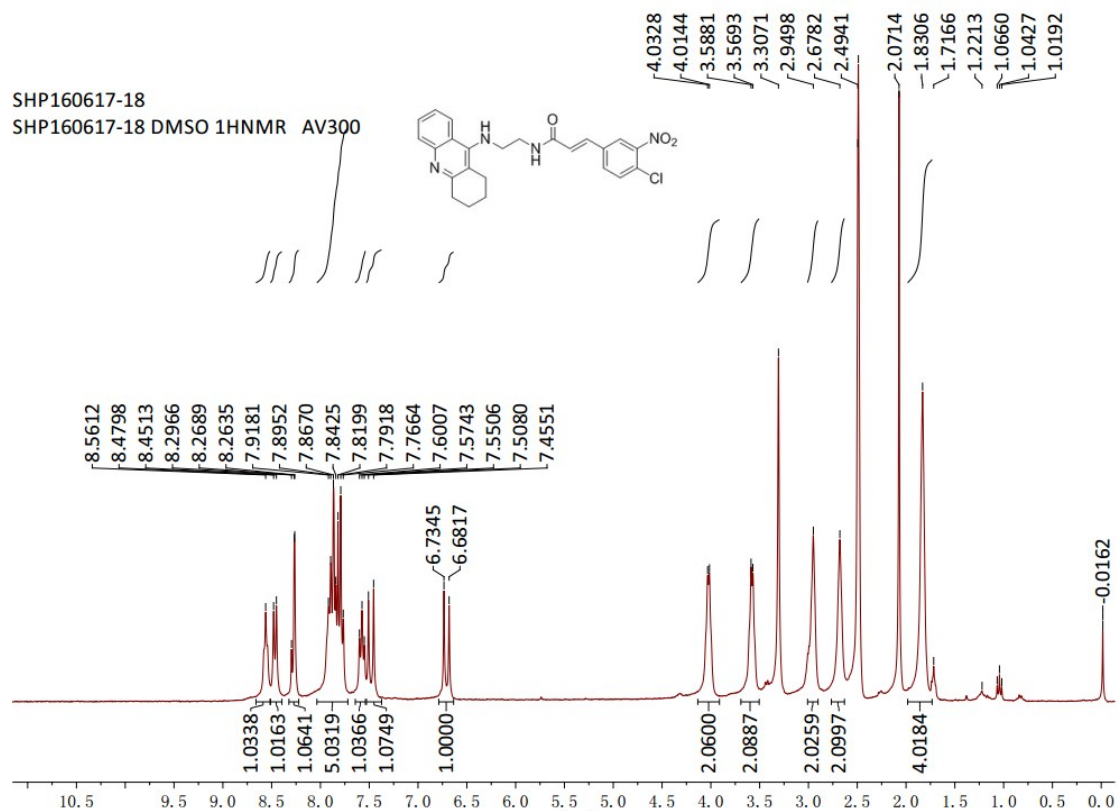

### 30 <sup>13</sup>C NMR spectrum

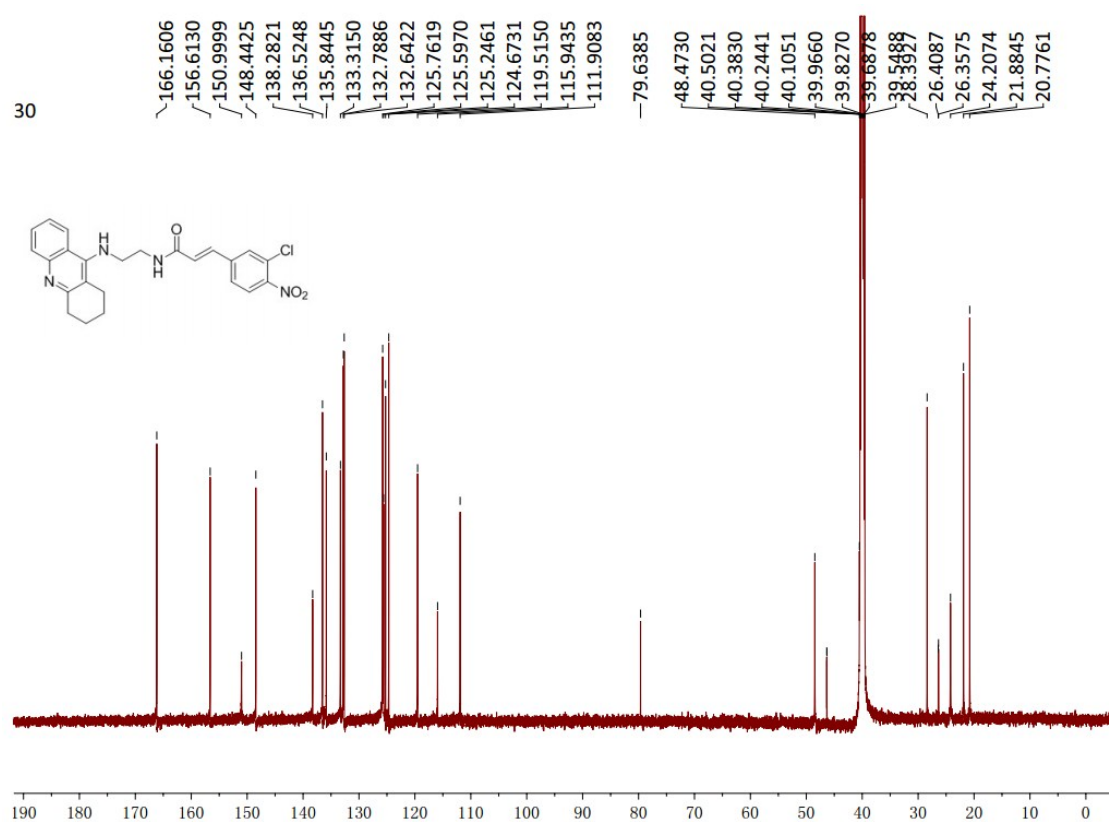

### 31 <sup>1</sup>H NMR spectrum

SHP160603-9

SHP160603-9 DMSO 1HNMR AV300

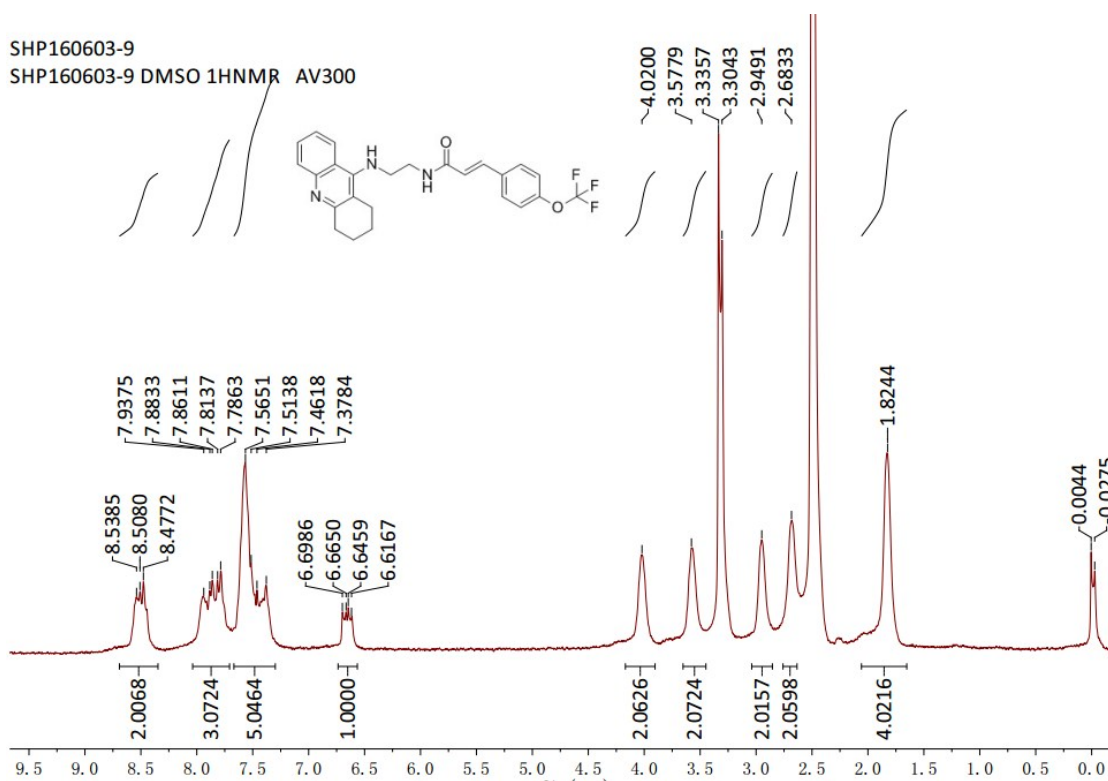

### 31 <sup>13</sup>C NMR spectrum

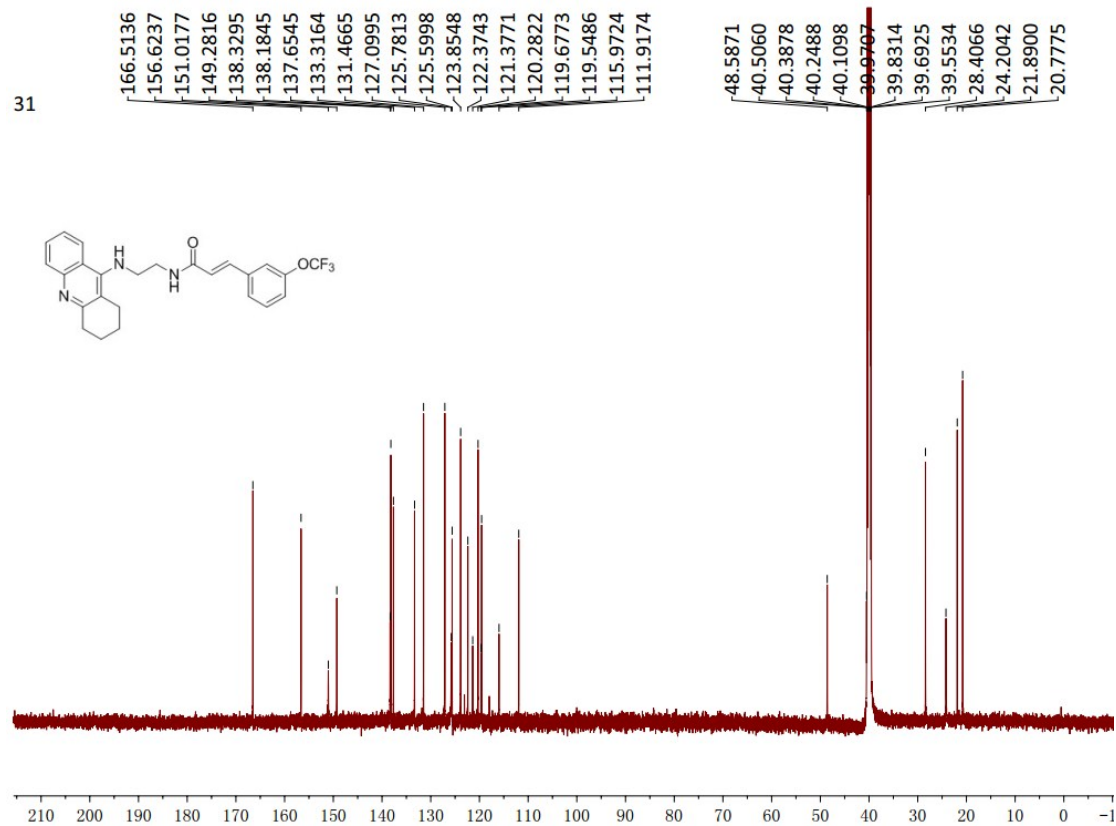



### 32 <sup>1</sup>H NMR spectrum

LHZ160617-5

LHZ160617-5 DMSO 1HNMR AV300

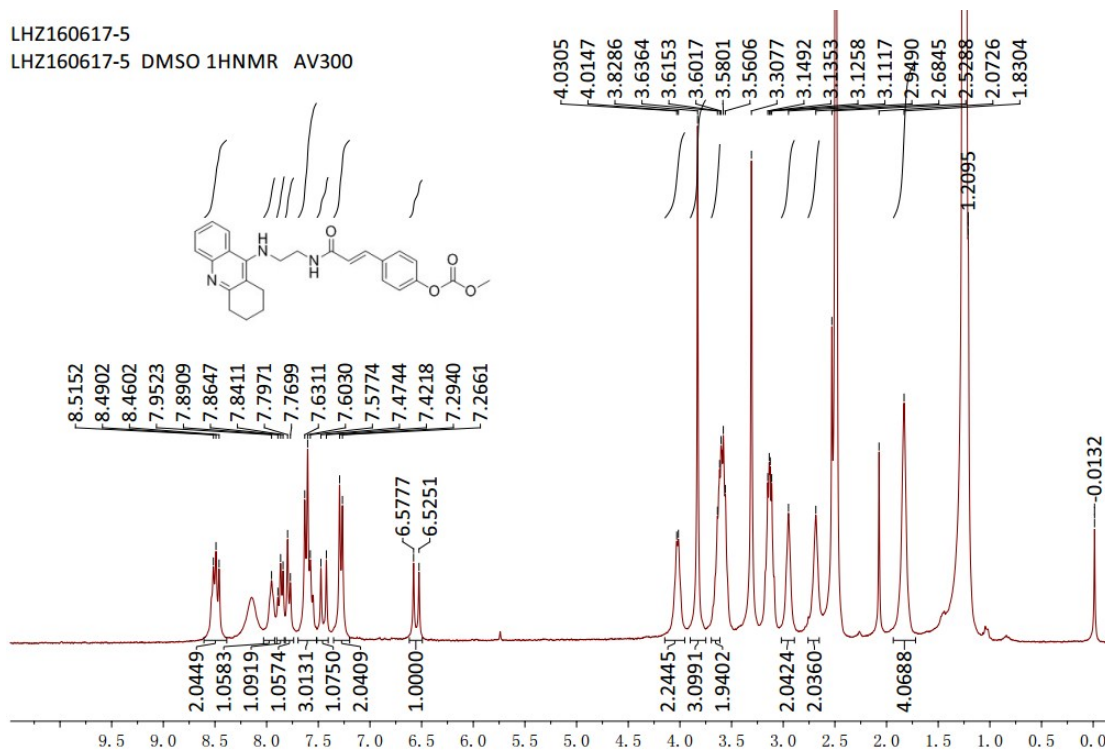

### 32 <sup>13</sup>C NMR spectrum

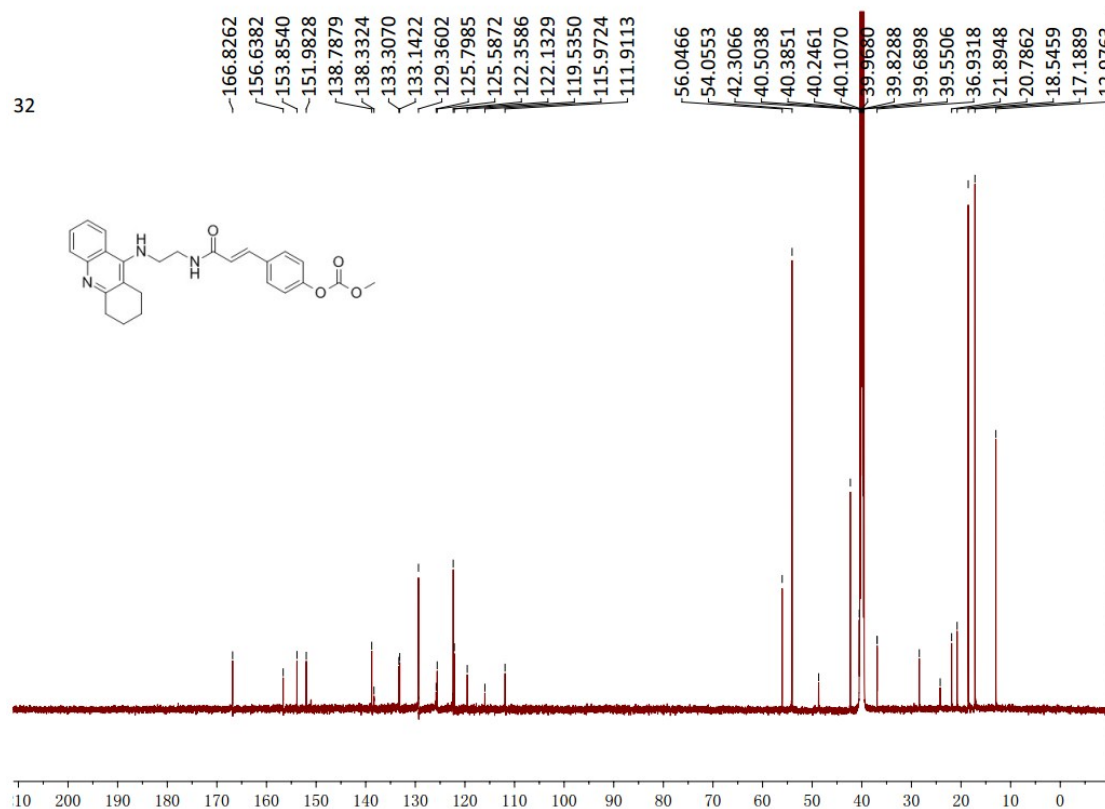



### 33 <sup>1</sup>H NMR spectrum

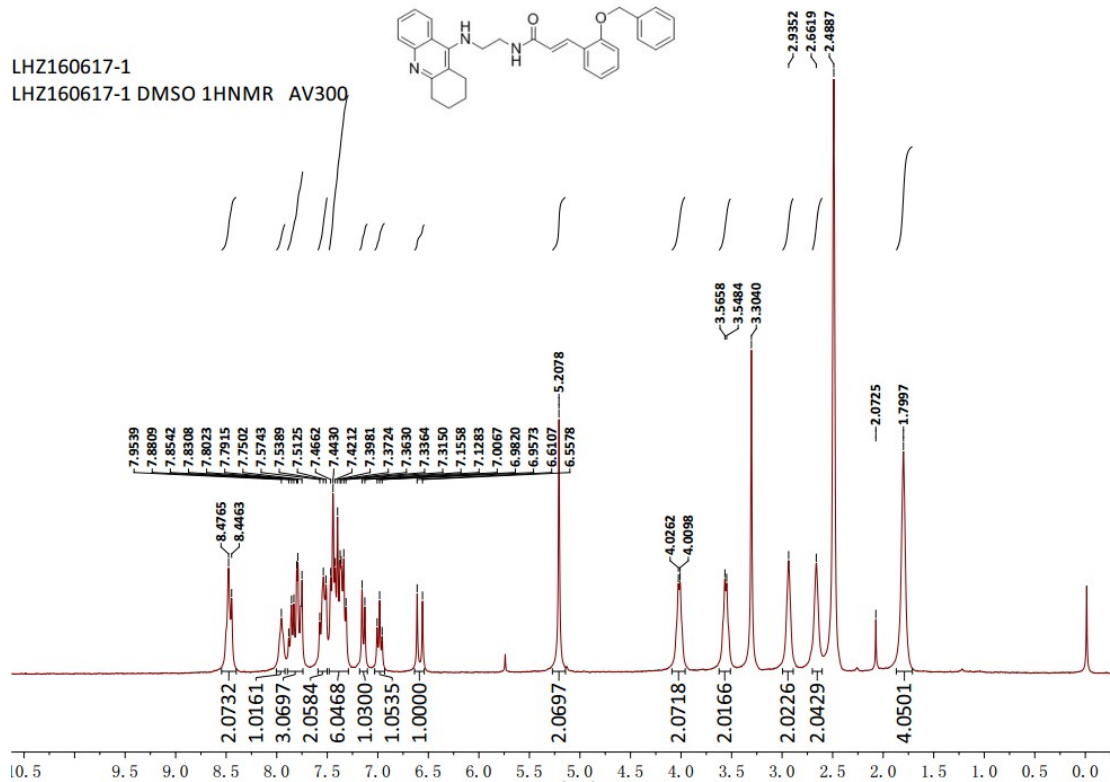

### 33 <sup>13</sup>C NMR spectrum

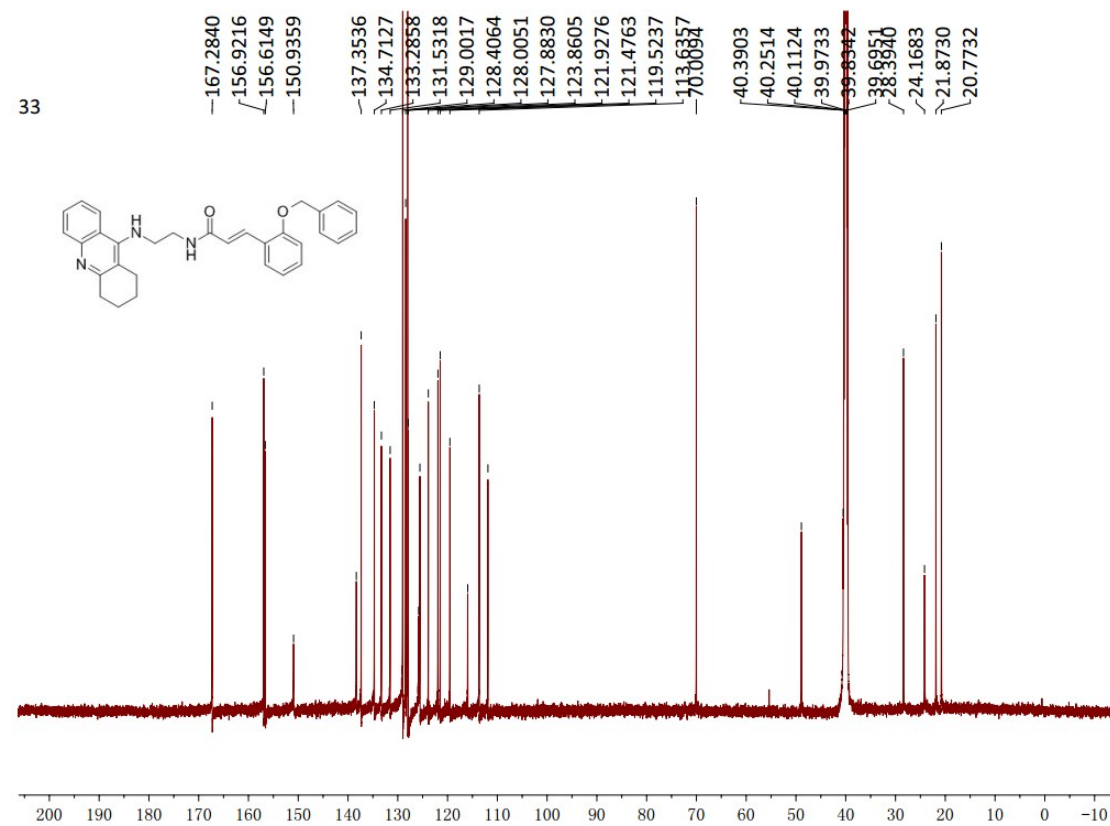

### 34 <sup>1</sup>H NMR spectrum

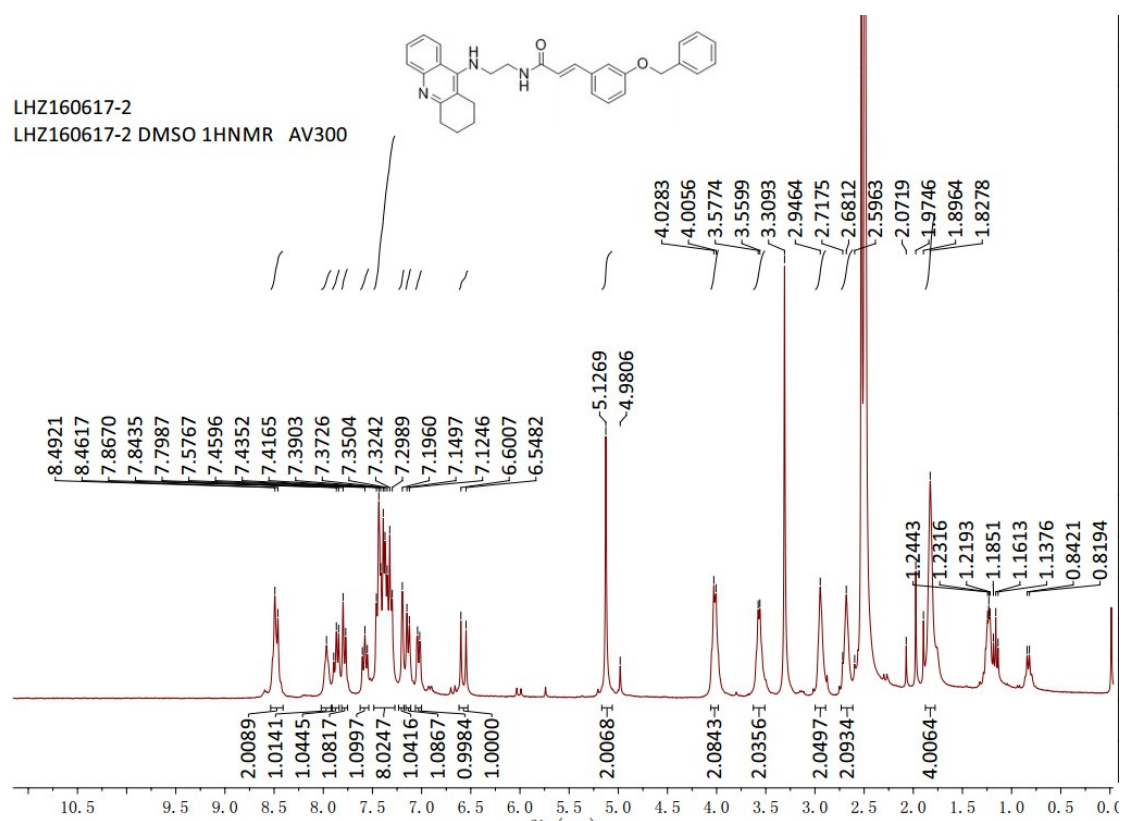

### 34 <sup>13</sup>C NMR spectrum

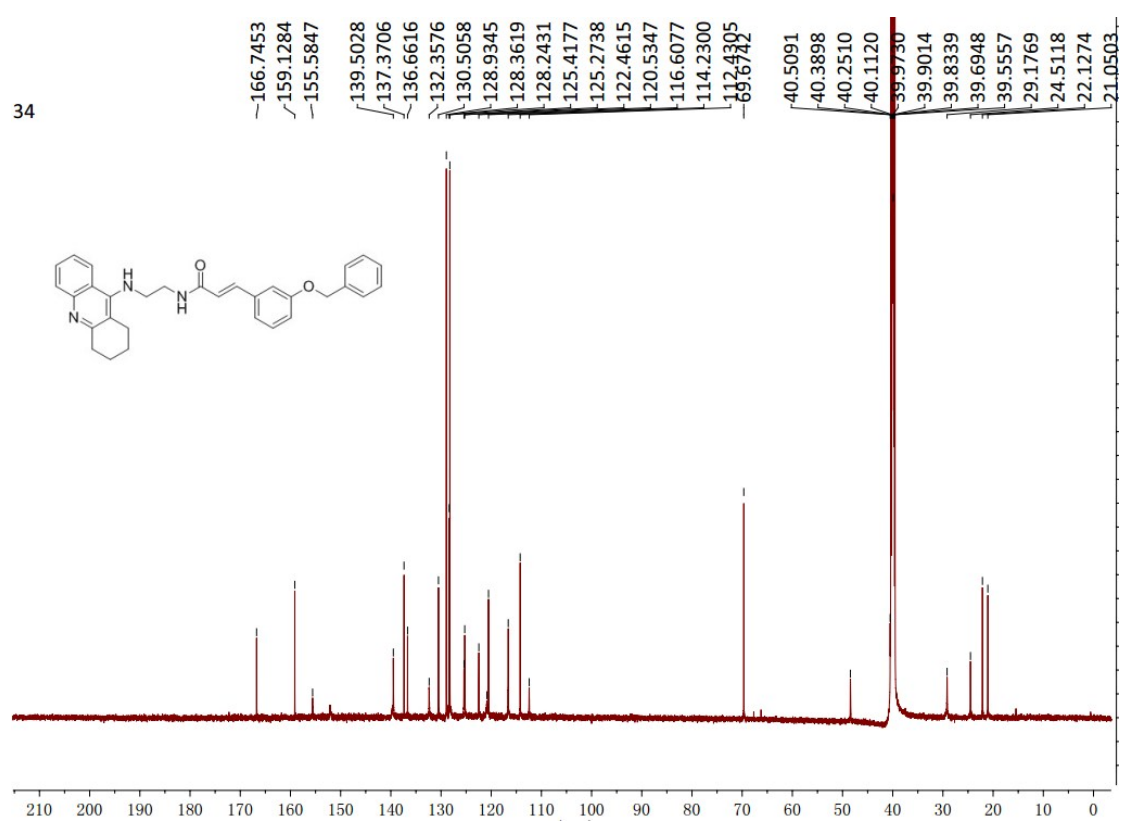

### 35 <sup>1</sup>H NMR spectrum

SHP160603-5  
SHP160603-5 DMSO 1HNMR AV300

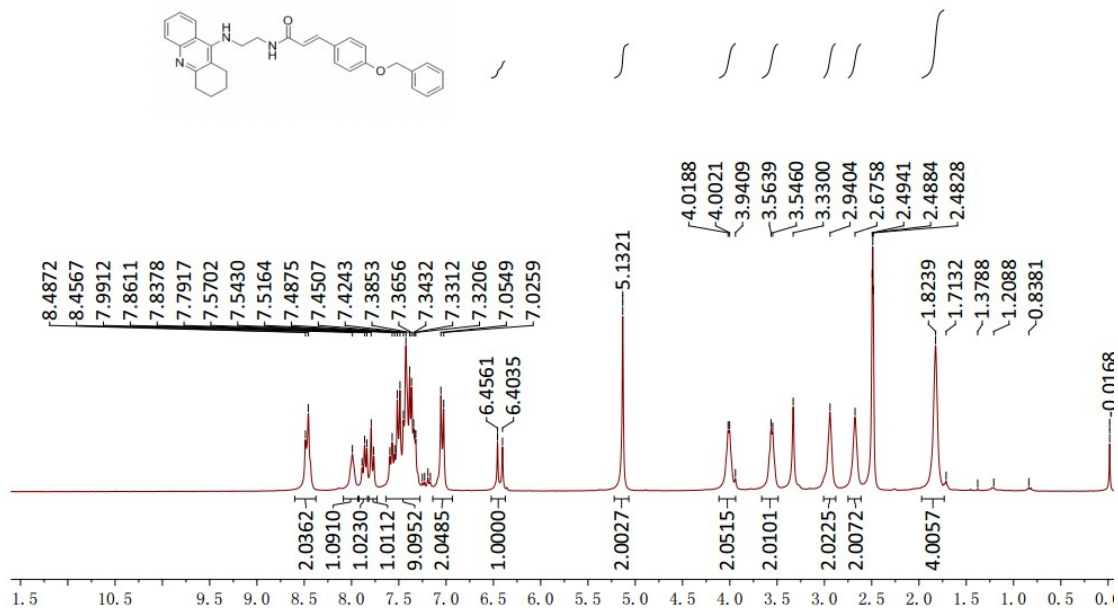

### 35 <sup>13</sup>C NMR spectrum

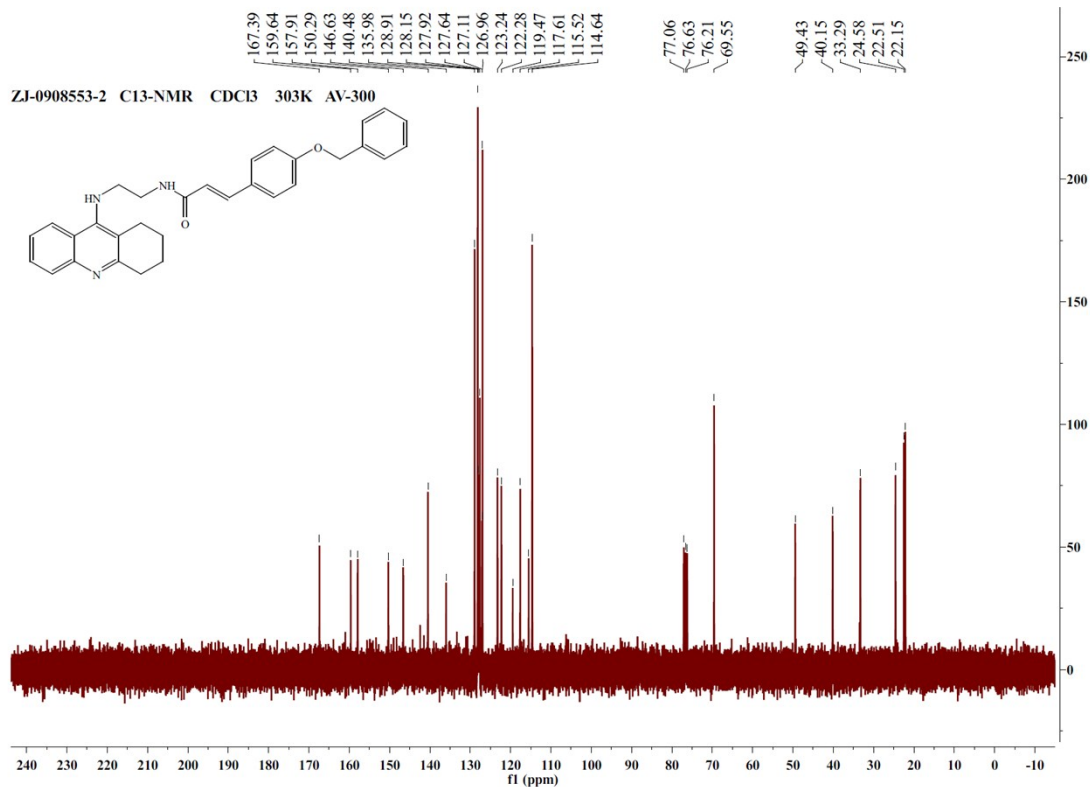

**36**  $^1\text{H}$  NMR spectrum

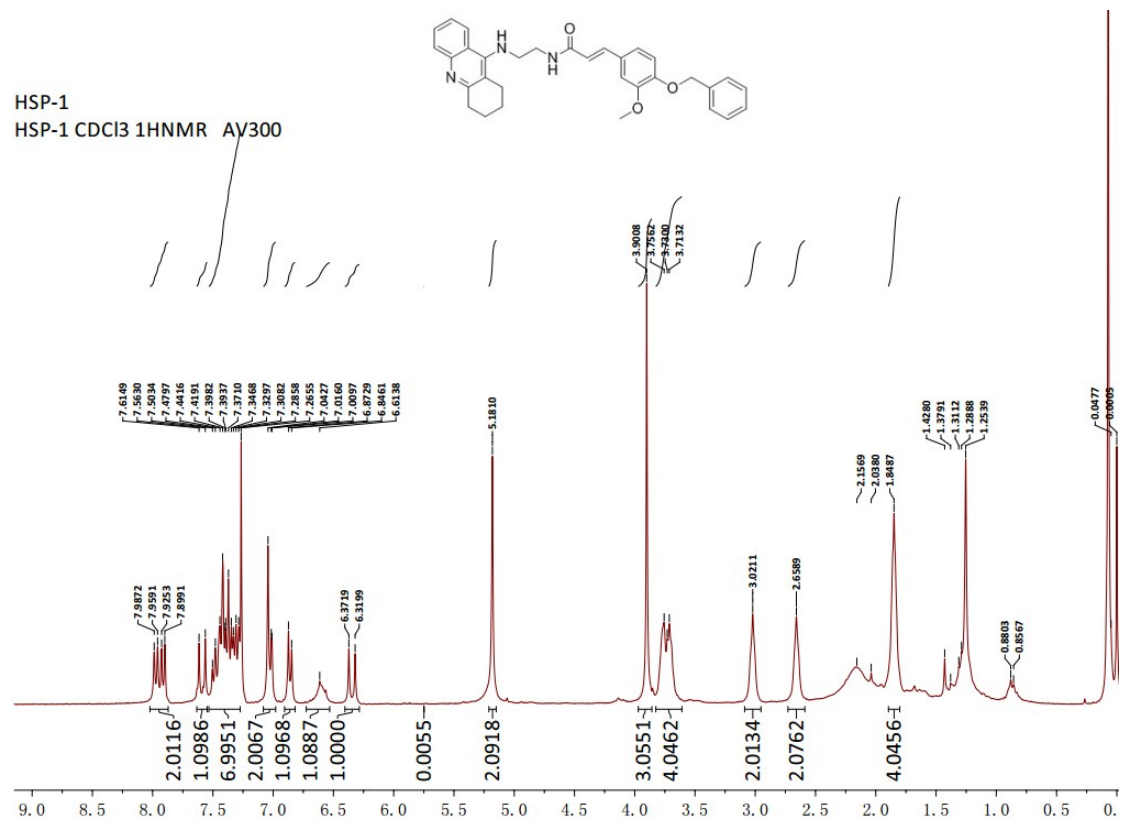

**36**  $^{13}\text{C}$  NMR spectrum

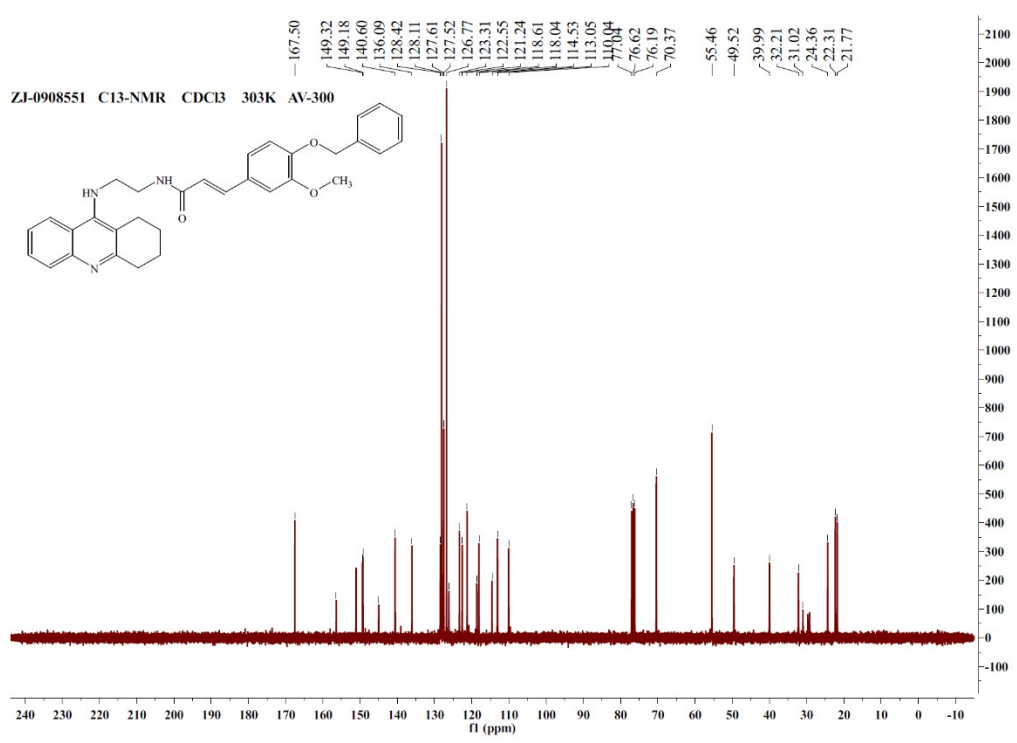

### 37 <sup>1</sup>H NMR spectrum

LHZ20160822-1

LHZ20160822-1 DMSO 1HNMR AV300

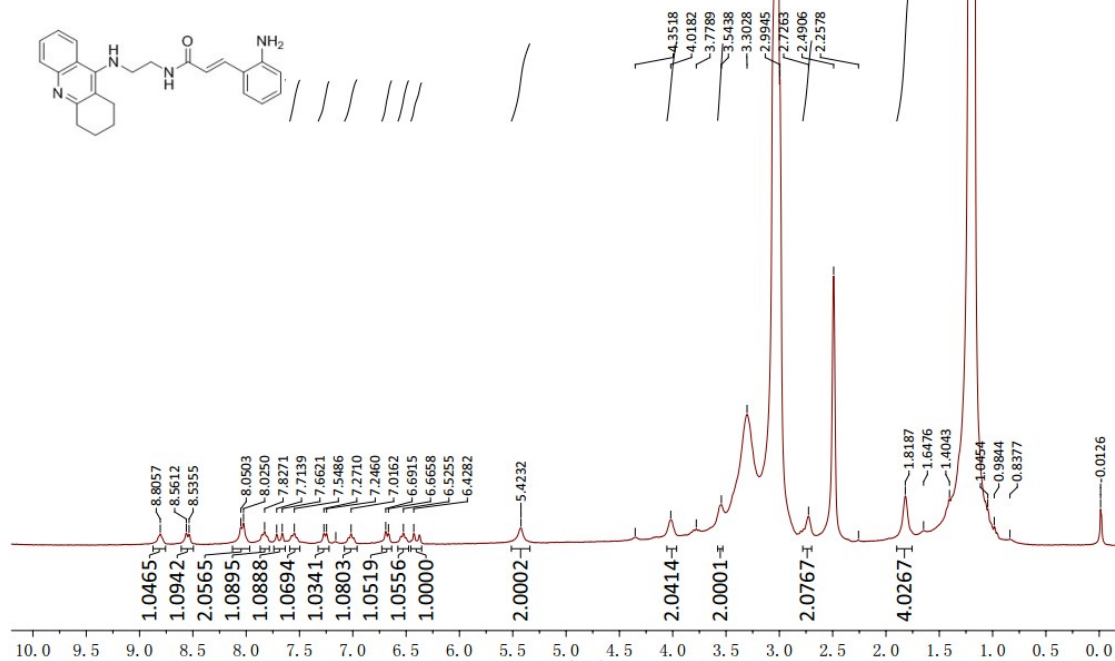

### 37 <sup>13</sup>C NMR spectrum

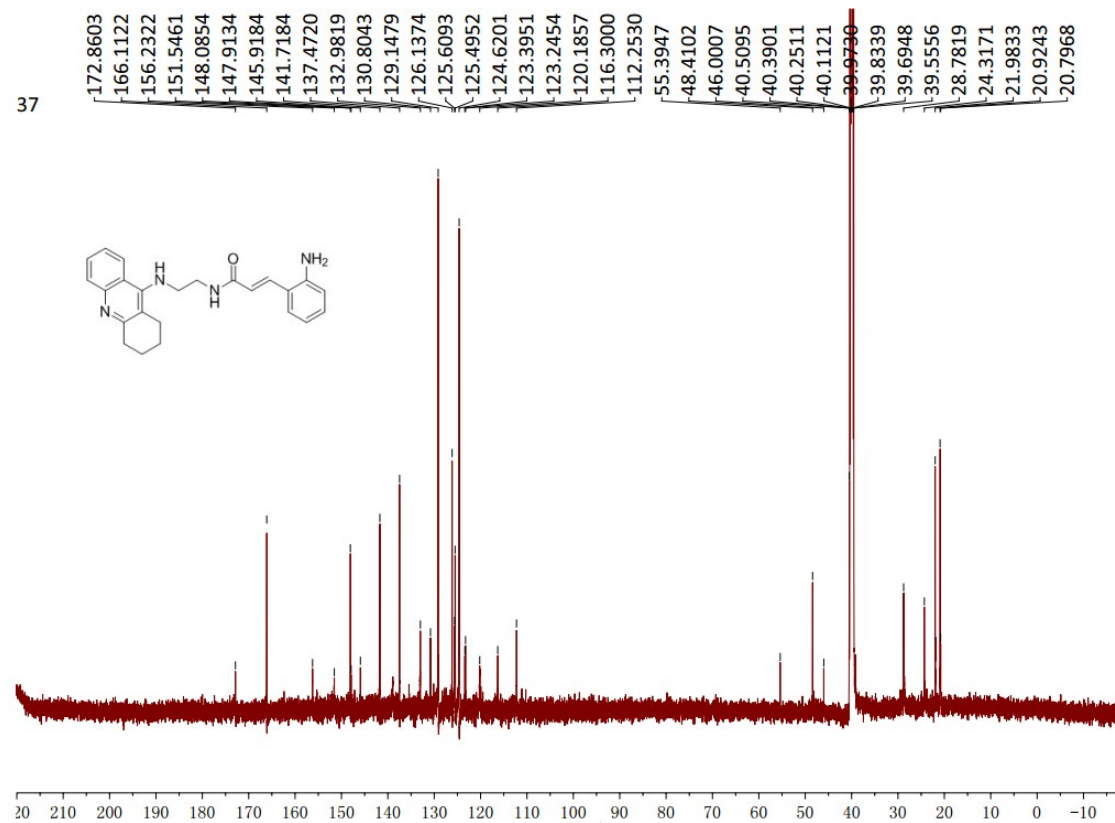



### 38 <sup>1</sup>H NMR spectrum

LHZ160715-4  
LHZ160715-4 DMSO 1HNMR AV300

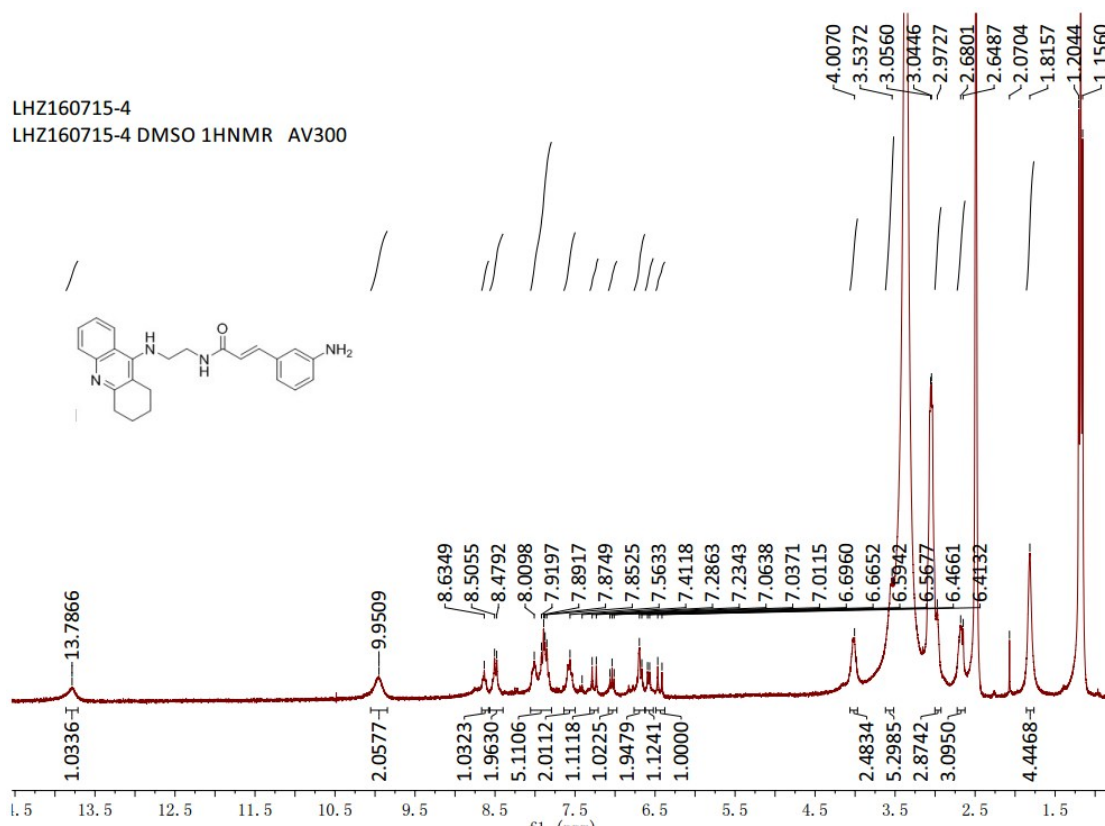

### 38 <sup>13</sup>C NMR spectrum

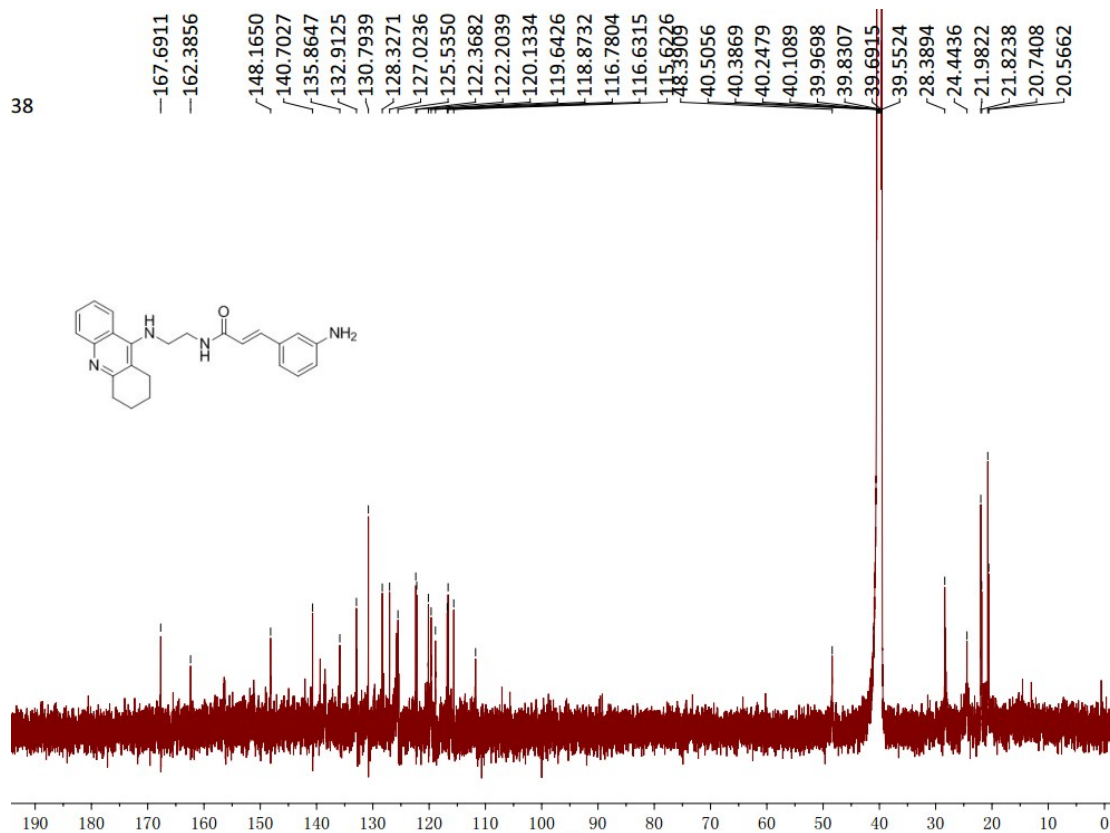

**39** <sup>1</sup>H NMR spectrum

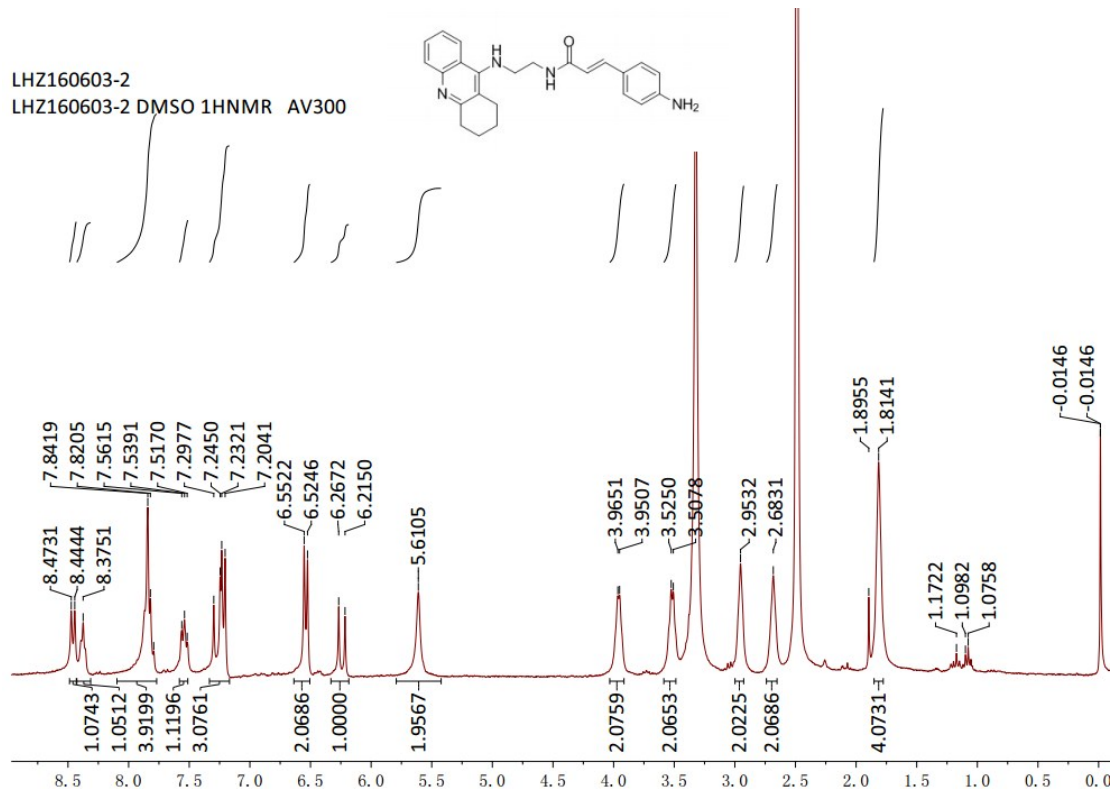

**39** <sup>13</sup>C NMR spectrum,

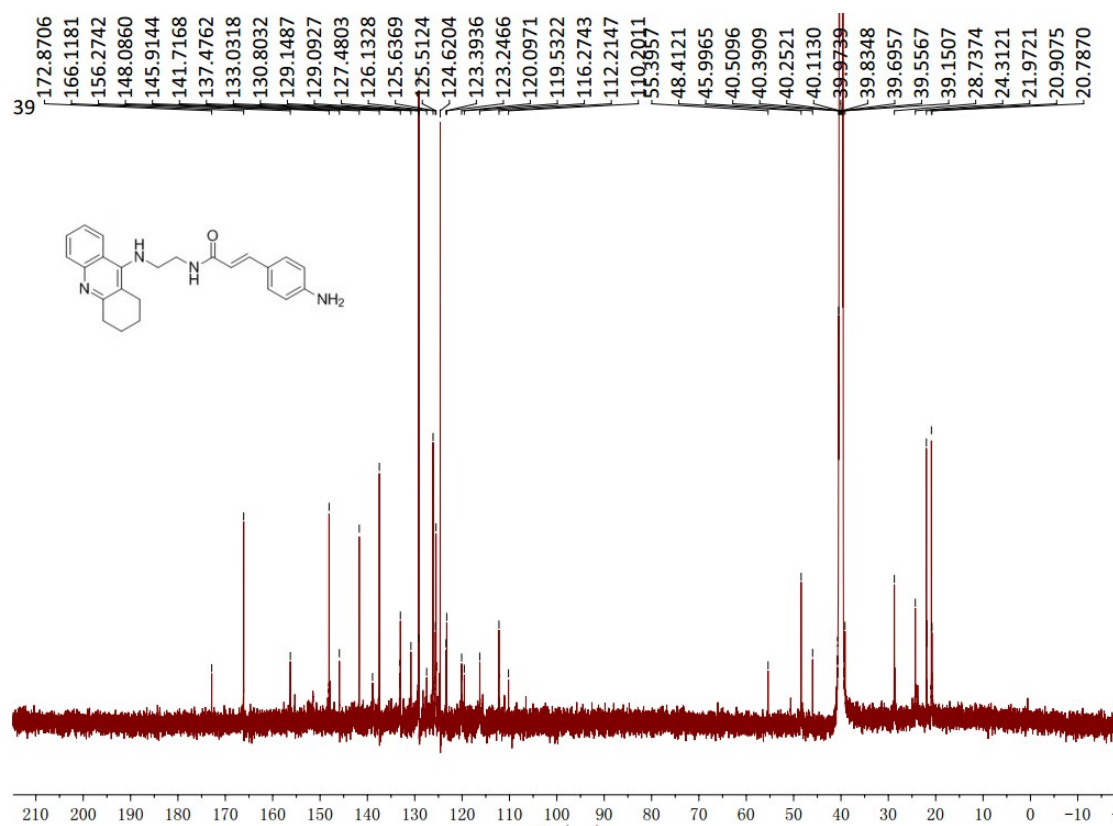

Table S1. The fluorescence intensity data of thioflavin T-based fluorometric assay.

| <b>Cpd.</b> | <b>Intensity (OD value)</b> | <b>Cpd.</b>                               | <b>Intensity (OD value)</b> |
|-------------|-----------------------------|-------------------------------------------|-----------------------------|
| <b>8</b>    | 1.269                       | <b>26</b>                                 | 1.079                       |
| <b>9</b>    | 0.946                       | <b>27</b>                                 | 1.282                       |
| <b>10</b>   | 0.949                       | <b>28</b>                                 | 1.287                       |
| <b>11</b>   | 0.850                       | <b>29</b>                                 | 1.188                       |
| <b>12</b>   | 1.304                       | <b>30</b>                                 | 1.116                       |
| <b>13</b>   | 1.252                       | <b>31</b>                                 | 0.985                       |
| <b>14</b>   | 1.258                       | <b>32</b>                                 | 1.138                       |
| <b>15</b>   | 1.293                       | <b>33</b>                                 | 0.853                       |
| <b>16</b>   | 0.942                       | <b>34</b>                                 | 0.912                       |
| <b>17</b>   | 1.091                       | <b>35</b>                                 | 0.889                       |
| <b>18</b>   | 1.000                       | <b>36</b>                                 | 0.834                       |
| <b>19</b>   | 0.969                       | <b>37</b>                                 | 1.110                       |
| <b>20</b>   | 0.984                       | <b>38</b>                                 | 1.178                       |
| <b>21</b>   | 0.999                       | <b>39</b>                                 | 1.046                       |
| <b>22</b>   | 0.920                       | <b>Curcumin</b>                           | 0.785                       |
| <b>23</b>   | 1.075                       | <b>A<math>\beta</math><sub>1-42</sub></b> | 1.356                       |
| <b>24</b>   | 1.089                       | <b>ThT</b>                                | 0.120                       |
| <b>25</b>   | 1.269                       |                                           |                             |
